# Supplementary material for: Cytotoxic CD8+ T cells target citrullinated antigens in rheumatoid arthritis
Source: Springer Nature journal article supplement (doi:10.1038/s41467-022-35264-8), 2023-01-19
Supplement: MOESM1 [file 41467_2022_35264_MOESM1_ESM.pdf]

## Supplementary information

### **Cytotoxic CD8<sup>+</sup> T cells target citrullinated antigens in rheumatoid arthritis**

**Authors:** Jae-Seung Moon<sup>#1,2</sup>, Shady Younis<sup>#1,2,3</sup>, Nitya S. Ramadoss<sup>1,2</sup>, Radhika Iyer<sup>1,2</sup>, Khushboo Sheth<sup>1,2</sup>, Orr Sharpe<sup>1,2</sup>, Navin L. Rao<sup>4</sup>, Stephane Becart<sup>5</sup>, Julie A. Carman<sup>4</sup>, Eddie A. James<sup>6</sup>, Jane H. Buckner<sup>6</sup>, Kevin D. Deane<sup>7</sup>, V. Michael Holers<sup>7</sup>, Susan M. Goodman<sup>8,9</sup>, Laura T. Donlin<sup>8,9</sup>, Mark M. Davis<sup>3,10</sup>, William H. Robinson<sup>\*1,2,3</sup>

#### **Affiliations:**

<sup>1</sup>Division of Immunology and Rheumatology, Stanford University, Stanford, CA 94305, USA

<sup>2</sup>VA Palo Alto Health Care System, Palo Alto, CA, 94304, USA

<sup>3</sup>Institute for Immunity, Transplantation and Infection, Stanford University, Stanford, CA, USA

<sup>4</sup>Immunology Discovery, Janssen Research and Development LLC, Spring House, PA 19477, USA

<sup>5</sup>Immunology Discovery, Janssen Research and Development LLC, San Diego, CA 92121, USA

<sup>6</sup>Benaroya Research Institute, Seattle, WA 98101, USA

<sup>7</sup>Division of Rheumatology, University of Colorado School of Medicine, Aurora, CO 80220, USA

<sup>8</sup>Hospital for Special Surgery, New York, NY 10021, USA

<sup>9</sup>Weill Cornell Medicine, New York, NY 10021, USA

<sup>10</sup>Department of Microbiology and Immunology, Stanford University, Stanford, CA 94305, USA

<sup>#</sup>These authors contributed equally: Jae-Seung Moon, Shady Younis

<sup>\*</sup>To whom correspondence should be addressed: [w.robinson@stanford.edu](mailto:w.robinson@stanford.edu)

## Supplementary Figures

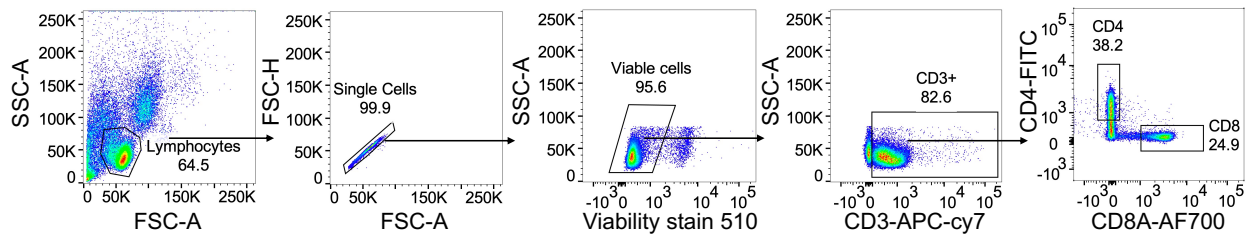

### Supplementary Fig. 1: Flow cytometric analysis of CD8<sup>+</sup> T cells in ACPA<sup>+</sup> RA patient blood.

Representative data from ACPA<sup>+</sup> RA PBMCs are displayed as flow cytometric plots, and the gating parameters for the CD8<sup>+</sup> T cell population indicated.

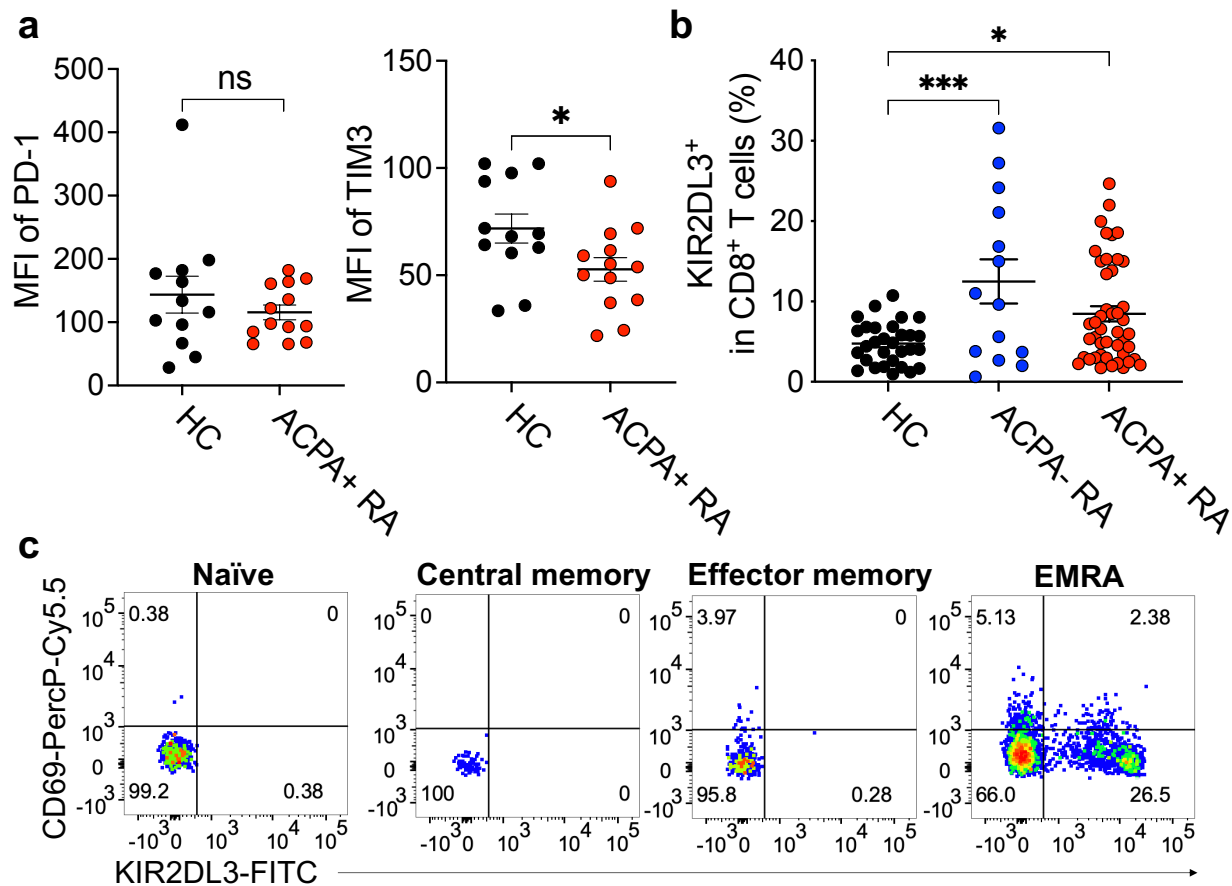

**Supplementary Fig. 2: Phenotypic characterization of CD8<sup>+</sup> T cells in ACPA+ RA patient blood.** **a** Expression of PD-1 or TIM3 in CD8<sup>+</sup> T cells from PBMCs from healthy controls ( $n = 12$ ) or ACPA+ RA patients ( $n = 13$ ) measured by flow cytometry.  $*P=0.0376$ . **b** Percentage of KIR2DL3<sup>+</sup>CD8<sup>+</sup> T cells in HC ( $n = 30$ ), ACPA- RA ( $n = 14$ ), or ACPA+ RA ( $n = 45$ ) analyzed by flow cytometry ( $***P=0.0007$ , or  $*P=0.0355$ ). **c** Representative dot plots showing expression levels of CD69 and KIR2DL3 in CD8<sup>+</sup> T memory subsets (naïve, CM, EM, or EMRA). Data are presented as means  $\pm$  SEM.  $*P < 0.05$  or  $***P < 0.001$  by two-tailed unpaired  $t$ -test (**a**) or one-way ANOVA (**b**) with Tukey's multiple comparisons test. ns, not significant. Source data are provided as a Source Data file. HC healthy control, ACPA anti-citrullinated protein antibodies, RA rheumatoid arthritis, MFI median fluorescence intensity.

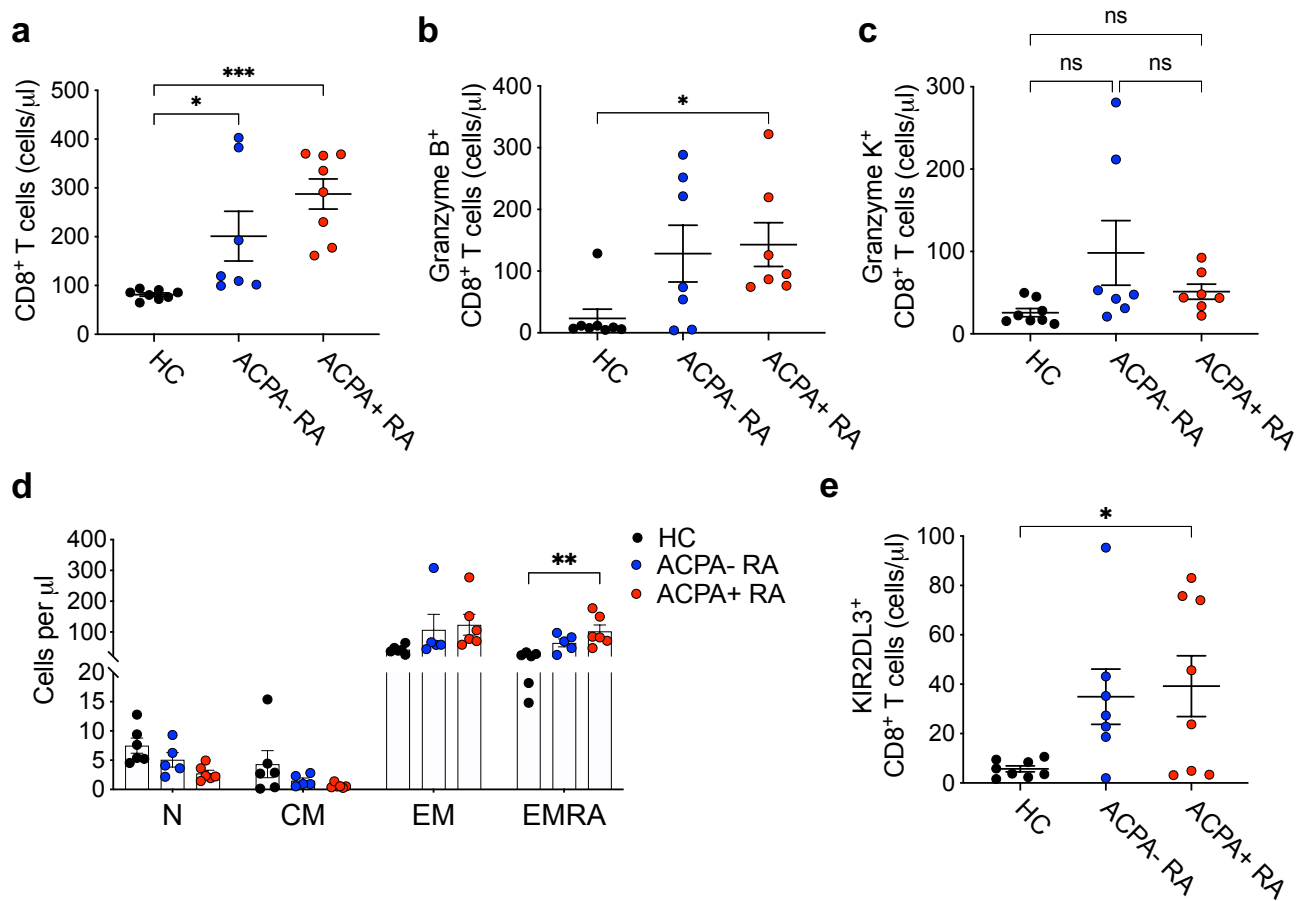

**Supplementary Fig. 3: Absolute cell counts of CD8<sup>+</sup> T cells in ACPA+ RA patients.** Absolute cell numbers of total CD8<sup>+</sup> T cells (**a**, HC n = 8, ACPA- RA n = 7, ACPA+ RA n = 8, \**P*=0.0466, or \*\*\**P*=0.0005), granzyme B-expressing CD8<sup>+</sup> T cells (**b**, HC n = 8, ACPA- RA n = 7, ACPA+ RA n = 7, \**P*=0.0473), or granzyme K (**c**, HC n = 8, ACPA- RA n = 7, ACPA+ RA n = 7)-expressing CD8<sup>+</sup> T cells, memory CD8<sup>+</sup> T cells (**d**, HC n = 6, ACPA- RA n = 5, ACPA+ RA n = 5, \**P*=0.006), or KIR2DL3<sup>+</sup>CD8<sup>+</sup> T cells (**e**, HC n = 8, ACPA- RA n = 7, ACPA+ RA n = 8, \**P*=0.0484) per 1 µl assessed by counting beads in each PBMC. Data are presented as means ± SEM. \**P* < 0.05, \*\**P* < 0.01, or \*\*\**P* < 0.001 by ordinary one-way ANOVA (**a-c**, **e**) or two-way ANOVA (**d**) with Tukey's multiple comparisons test. ns, not significant. Source data are provided as a Source Data file. HC healthy control, ACPA anti-citrullinated protein antibodies, RA rheumatoid arthritis.

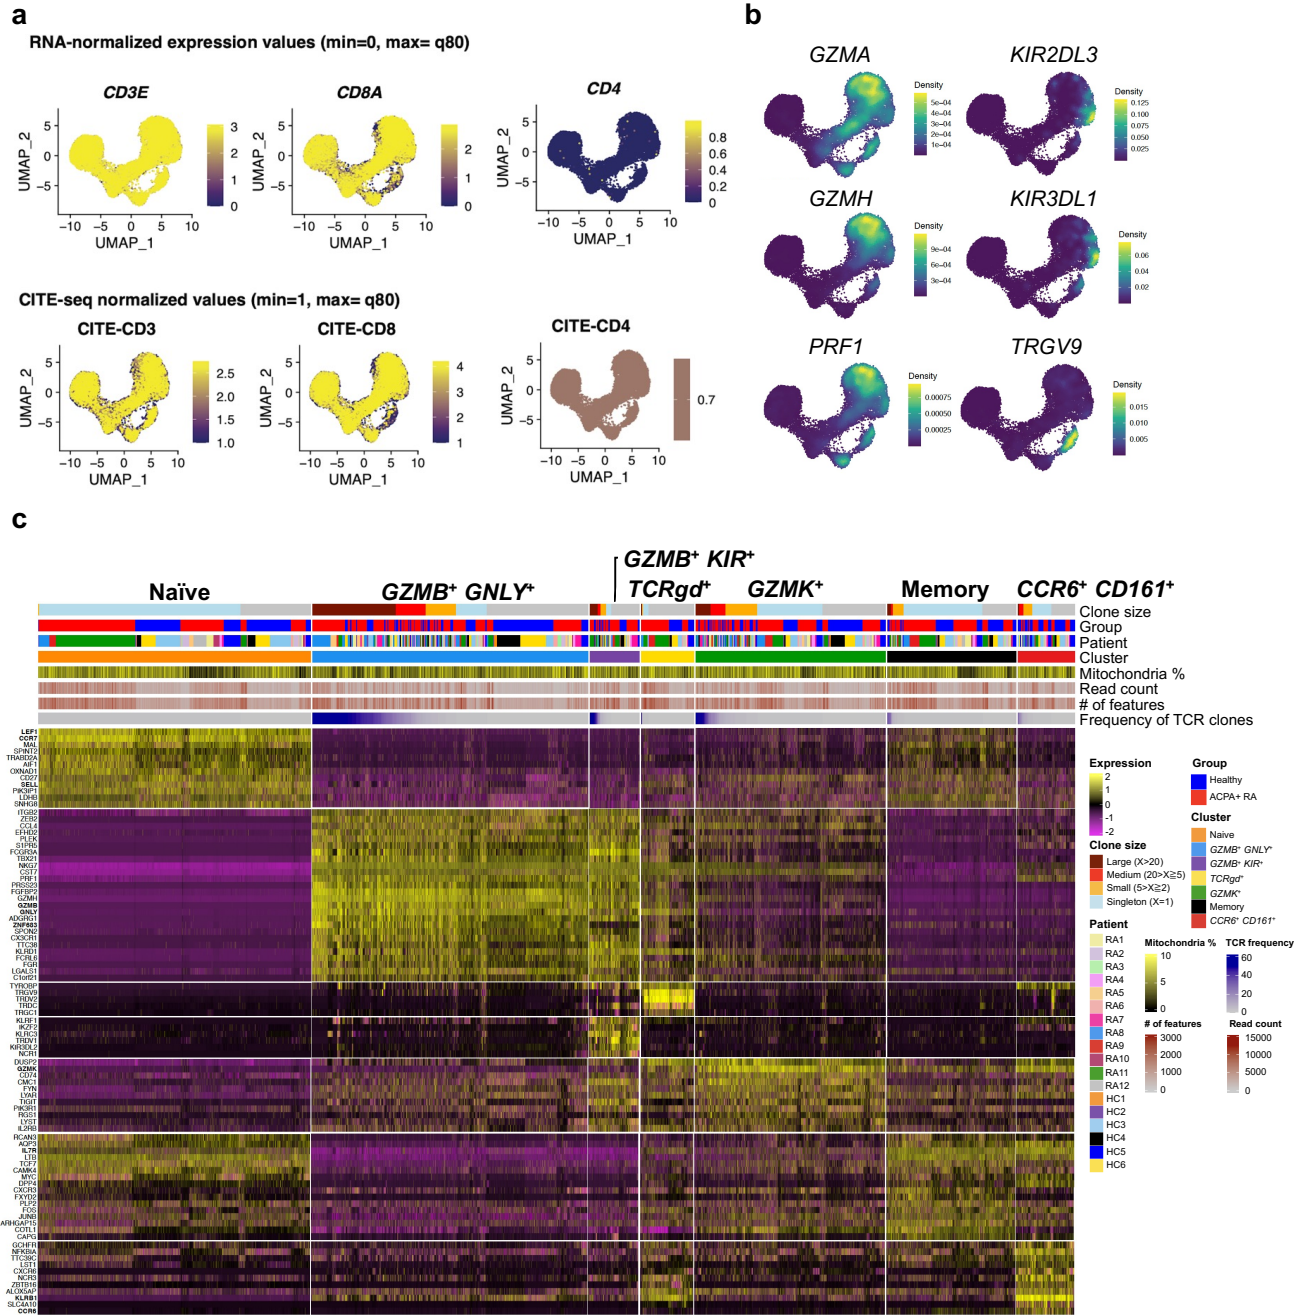

**Supplementary Fig. 4: Expression of cell type marker genes in CD8<sup>+</sup> T cells from ACPA+ RA and healthy control blood. a** mRNA and CITE-seq expression of marker genes (*CD3E*, *CD8A*, and *CD4*) used to identify and confirm analysis of CD8<sup>+</sup> T cells. Color indicates the expression level of each marker gene. **b** Density plots display marker genes including *GZMA*, *KIR2DL3* or *TRGV9*) in CD8<sup>+</sup> T cells. **c** Heatmap of select differentially expressed gene signatures (log2 Fold Change > 0.8) in each cluster with bars; clonal size, patients, clusters, mitochondrial gene percentage, read count, number of features in each cell and frequency of TCR clone. ACPA anti-citrullinated protein antibodies, RA rheumatoid arthritis.

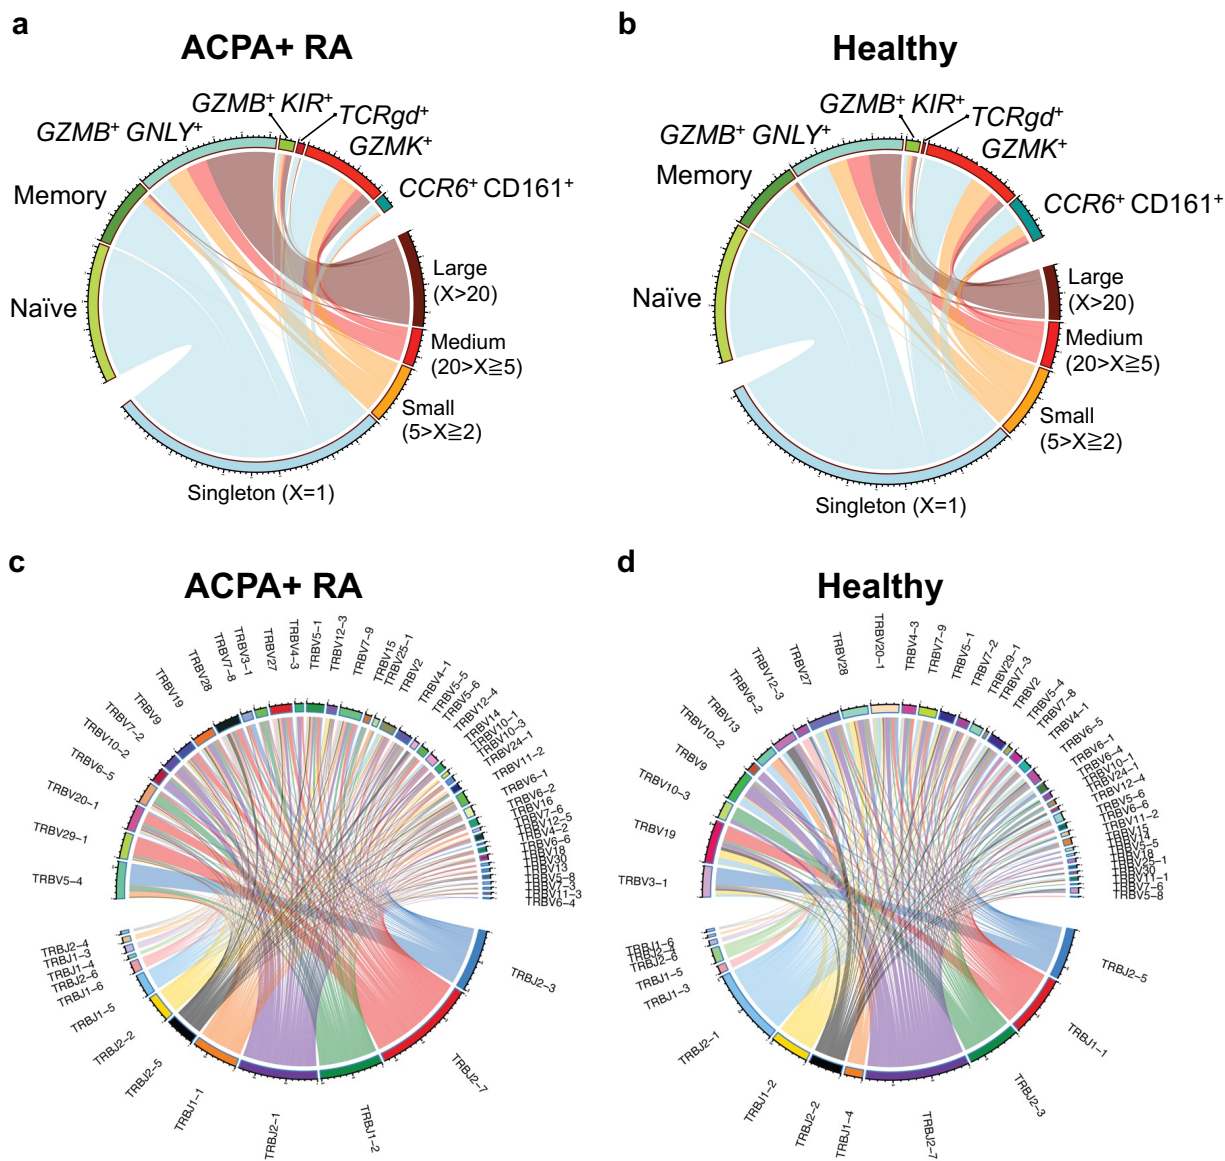

**Supplementary Fig. 5: CD8<sup>+</sup> T cells expressing cytotoxic mediators are clonally expanded in ACPA+ RA blood.** **a, b** Chord diagrams representing the contribution of each cluster to clonal sizes (**a**) and the shared clonotypes between clusters (**b**). **c** TCR beta chain V- and J-gene usage of CD8<sup>+</sup> T cells of ACPA+ RA blood. The width of each band represents the frequency of V- or J- gene usage. ACPA anti-citrullinated protein antibodies, RA rheumatoid arthritis.

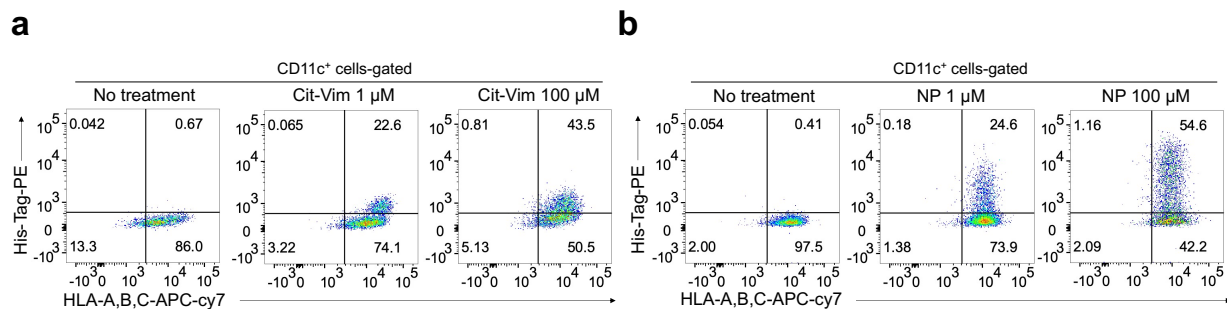

**Supplementary Fig. 6: CD11c<sup>+</sup> cells from ACPA+ RA patients endocytose cit-vimentin. a,b,** Representative flow cytometric plots of protein endocytosis by CD11c<sup>+</sup> cells in ACPA+ RA PBMCs show antigen-presenting cells uptake recombinant His-tagged cit-vimentin protein (**a**), or NP protein (**b**) in a dose-dependent manner (1 or 100  $\mu$ M) after 16 hr of culture. Cit-Vim citrullinated vimentin.

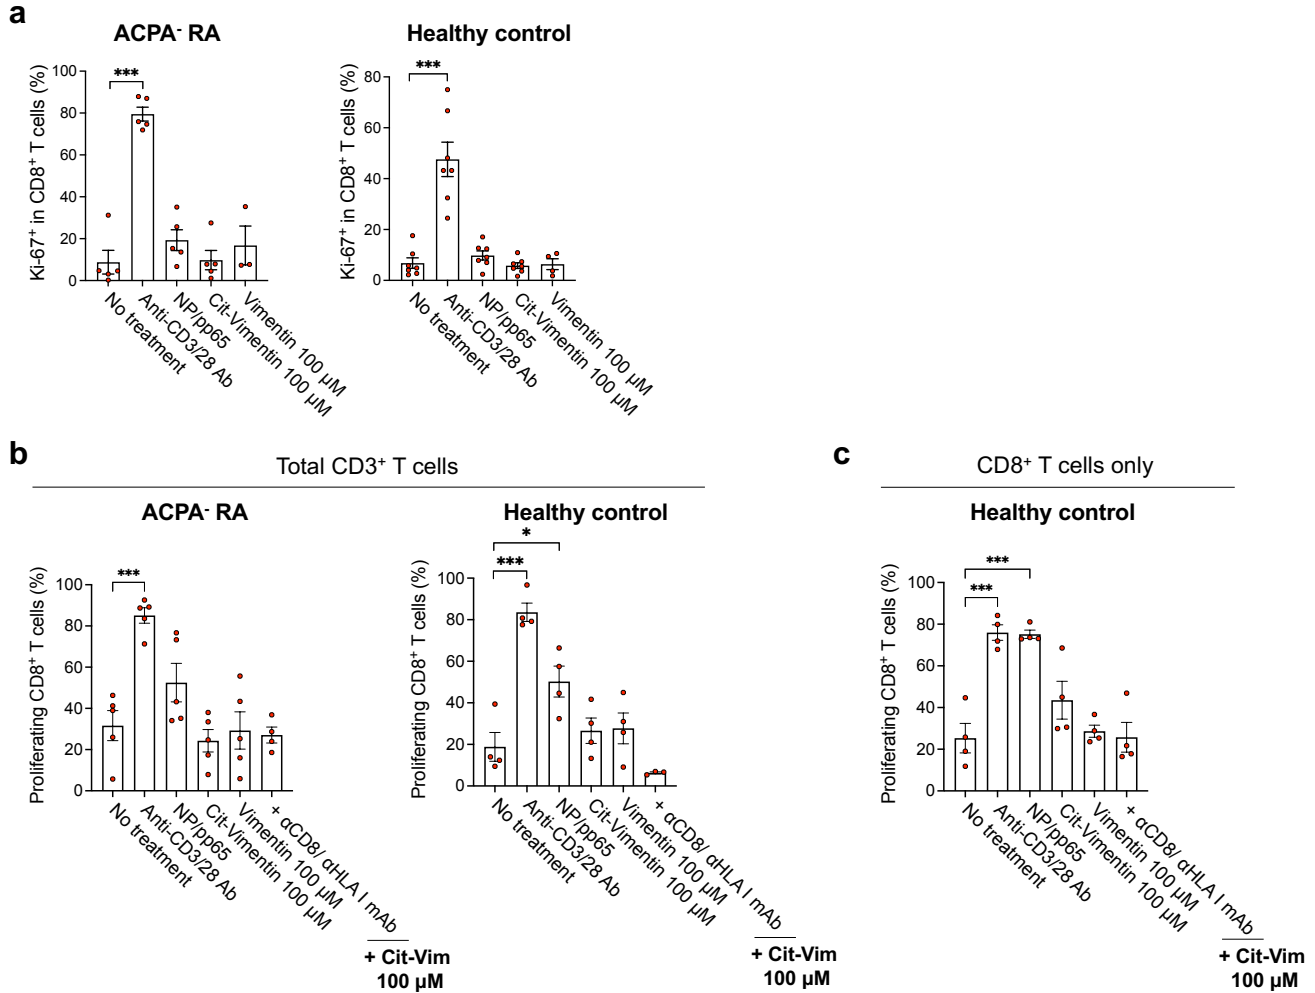

**Supplementary Fig. 7: Citrullinated vimentin does not induce the proliferation of ACPA-RA or HC CD8<sup>+</sup> T cells.** **a** Percentage of Ki-67<sup>+</sup>CD8<sup>+</sup> T cells in ACPA- RA ( $n = 5$ ) or HC ( $n = 7$ ) PBMCs after stimulation with anti-CD3/28 antibodies, NP (Influenza)/ pp65 (CMV) proteins (50  $\mu$ M of each), citrullinated vimentin (100  $\mu$ M), or native vimentin (100  $\mu$ M) for 16 hr. \*\*\* $P < 0.0001$ . **b, c** Quantification of the proliferating CD8<sup>+</sup> T cells in co-culture of monocyte-derived dendritic cells (MoDCs) with ACPA-RA or HC total CD3<sup>+</sup> T cells (**b**, \*\*\* $P=0.0002$  in ACPA- RA, \*\*\* $P=0.0002$ , or \* $P=0.0214$  in HC) or CD8<sup>+</sup> T cells only (**c**,  $n = 4$ , \*\*\* $P=0.0007$ , or \*\*\* $P=0.0005$ ). For **b**, no treatment, anti-CD3/28 Ab, NP/pp65, cit-vimentin or native vimentin  $n = 5$ , cit-vimentin with anti-CD8/ HLA class I antibodies  $n = 4$  in ACPA-RA and no treatment, anti-CD3/28 Ab, NP/pp65, cit-vimentin or native vimentin  $n = 4$  and cit-vimentin with anti-CD8/ HLA class I antibodies  $n = 3$  in HC. Bars represent means  $\pm$  SEM. \* $P < 0.05$  or \*\*\* $P < 0.001$  by ordinary one-way ANOVA with Tukey's multiple comparisons test. Source data are provided as

a Source Data file. ACPA anti-citrullinated protein antibodies, RA rheumatoid arthritis. mAb monoclonal antibody.



**Supplementary Fig. 8: Single-cell RNA sequencing of CD3<sup>+</sup> T cells stimulated by native or citrullinated antigens.** **a** UMAP plot representing 17 distinct clusters of CD3<sup>+</sup> T cells (n = 13,354) stimulated by native or citrullinated proteins. **b** Expression of *CD8A*, *CD4*, *GZMB*, *GNLY* or *GZMK* in the clusters. Color shows the expression level of each marker. **c** Heatmap showing transcriptional differences in each cluster. Top bars indicate clonal size, Protein treatment, patient group, clusters and scoring scale for RA trafficking and cytotoxicity. Individual T cells are ordered by clonal size in each cluster. RA rheumatoid arthritis, Vim vimentin, Ag antigen.

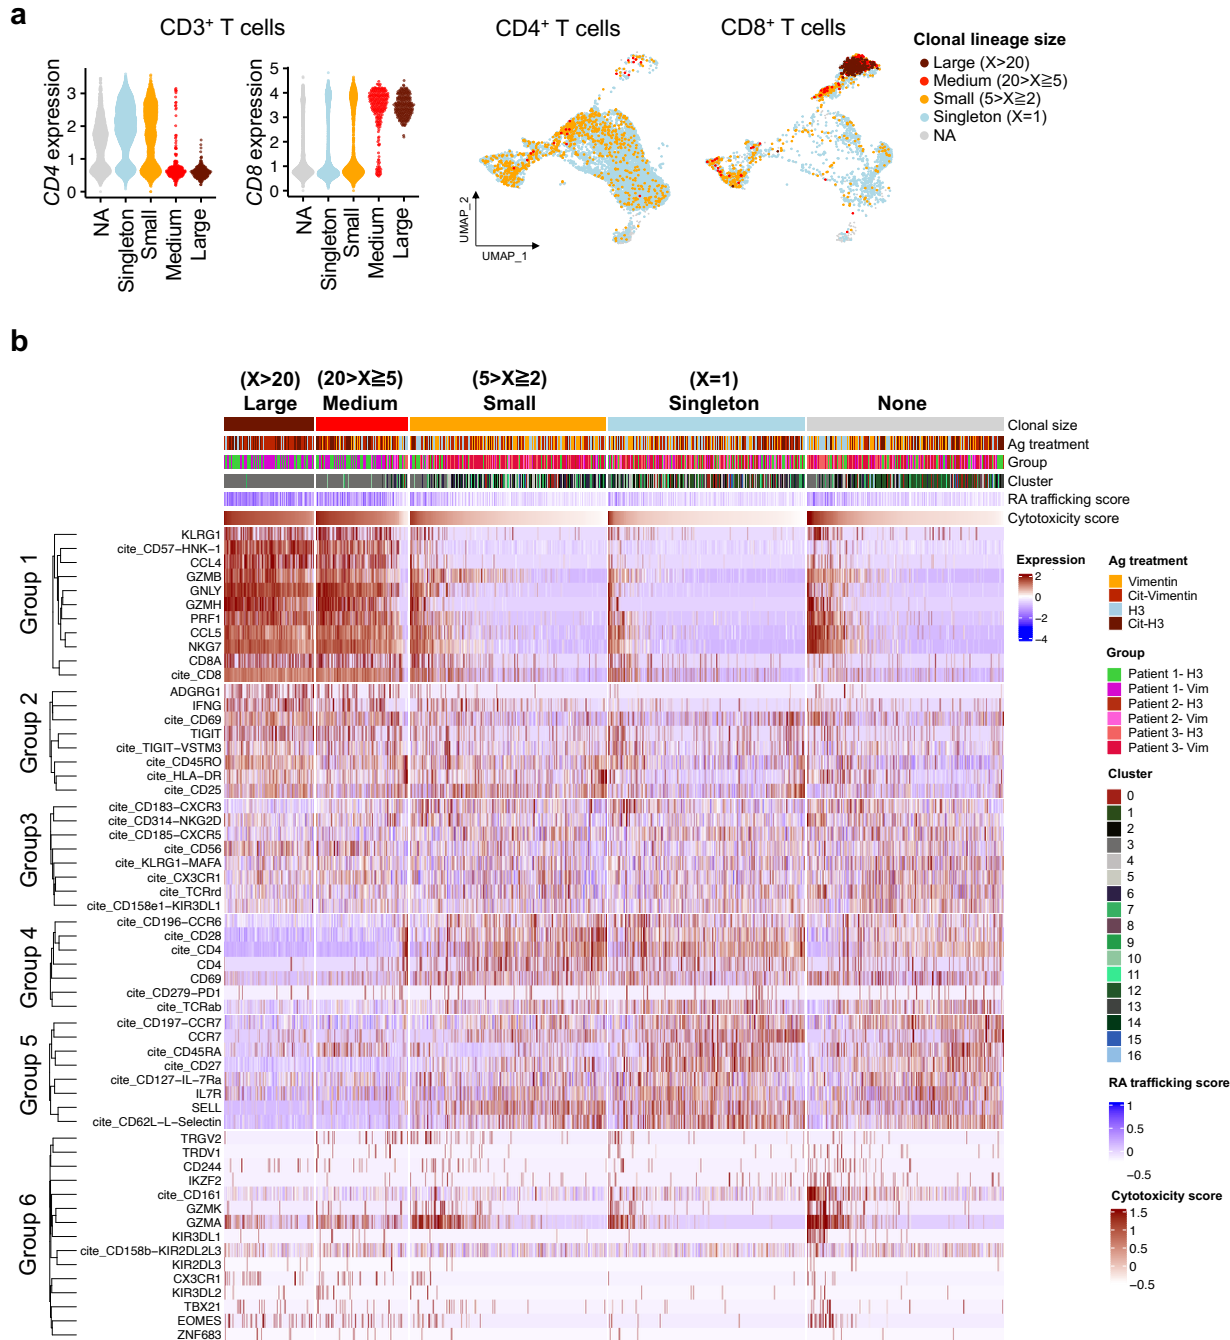

**Supplementary Fig. 9: Clonal lineages of CD4<sup>+</sup> and CD8<sup>+</sup> T cells stimulated by native or citrullinated antigens. a** Distribution of each clonal family in CD4<sup>+</sup> (n = 7,885) or CD8<sup>+</sup> (n = 3,284) T cells. **b** Heatmap representing 6 groups determined by unsupervised clustering based on the level of RNA and CITE-seq antibodies (cite\_). Individual T cells are ordered by cytotoxicity score in each cluster. Ag antigen, Vim vimentin.

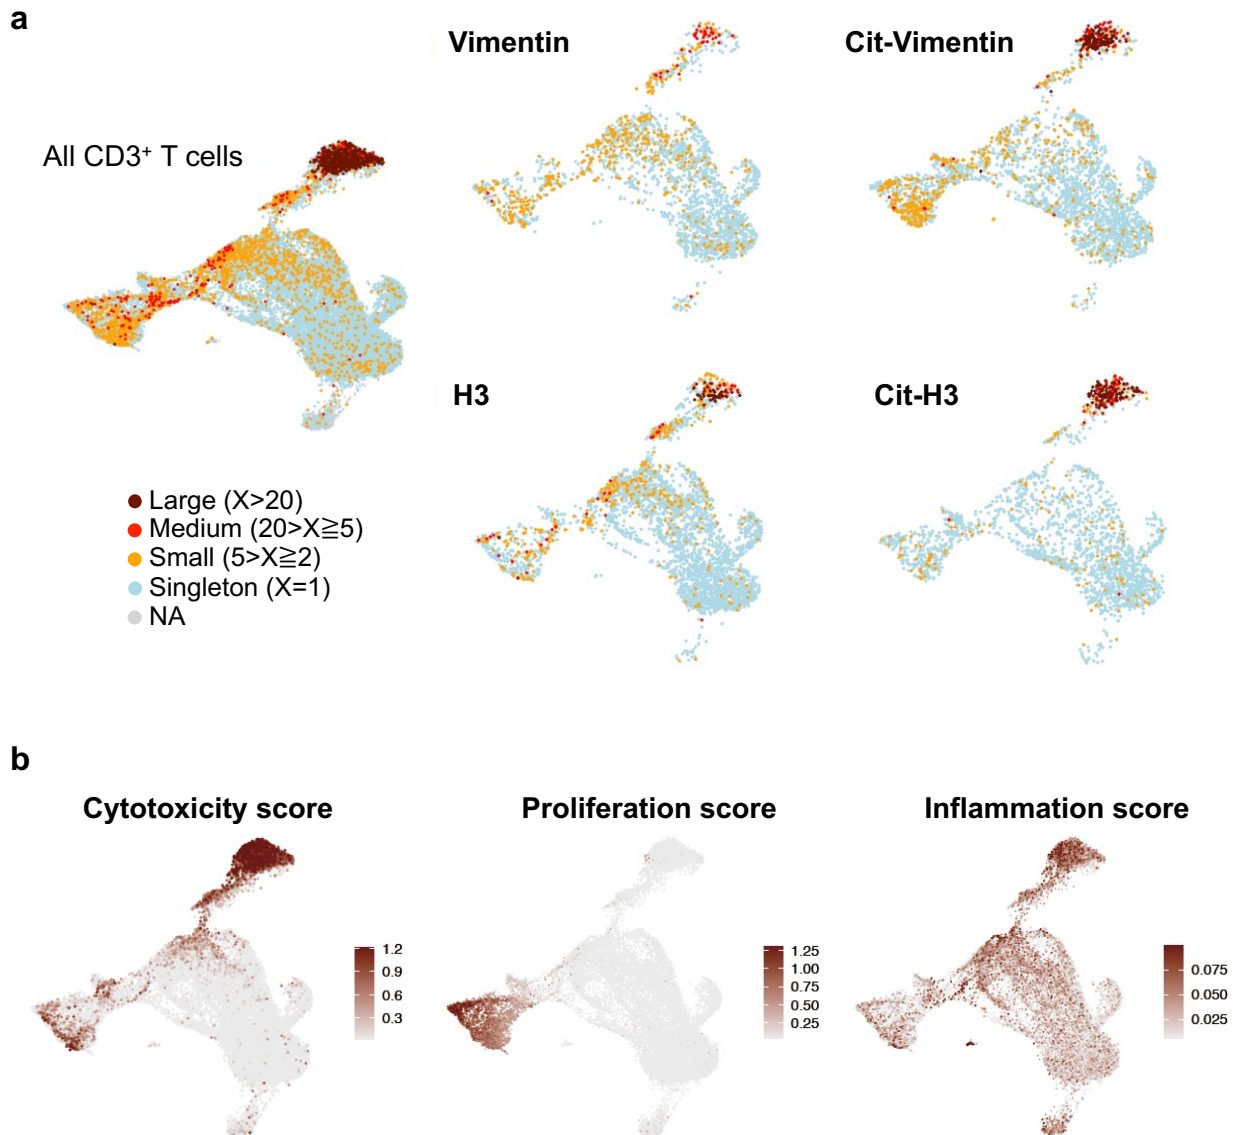

**Supplementary Fig. 10: Citrullinated antigens stimulate clonal expansion of CD3<sup>+</sup> T cells with high cytotoxicity scores.** **a** UMAP plots of all CD3<sup>+</sup> T cells stimulated by native or citrullinated Vimentin or H3 integrated with TCR clonality. **b** UMAP plots showing cytotoxicity, proliferation, or inflammation score. The score was calculated by the expression level of canonical marker genes. Cit- citrullinated.

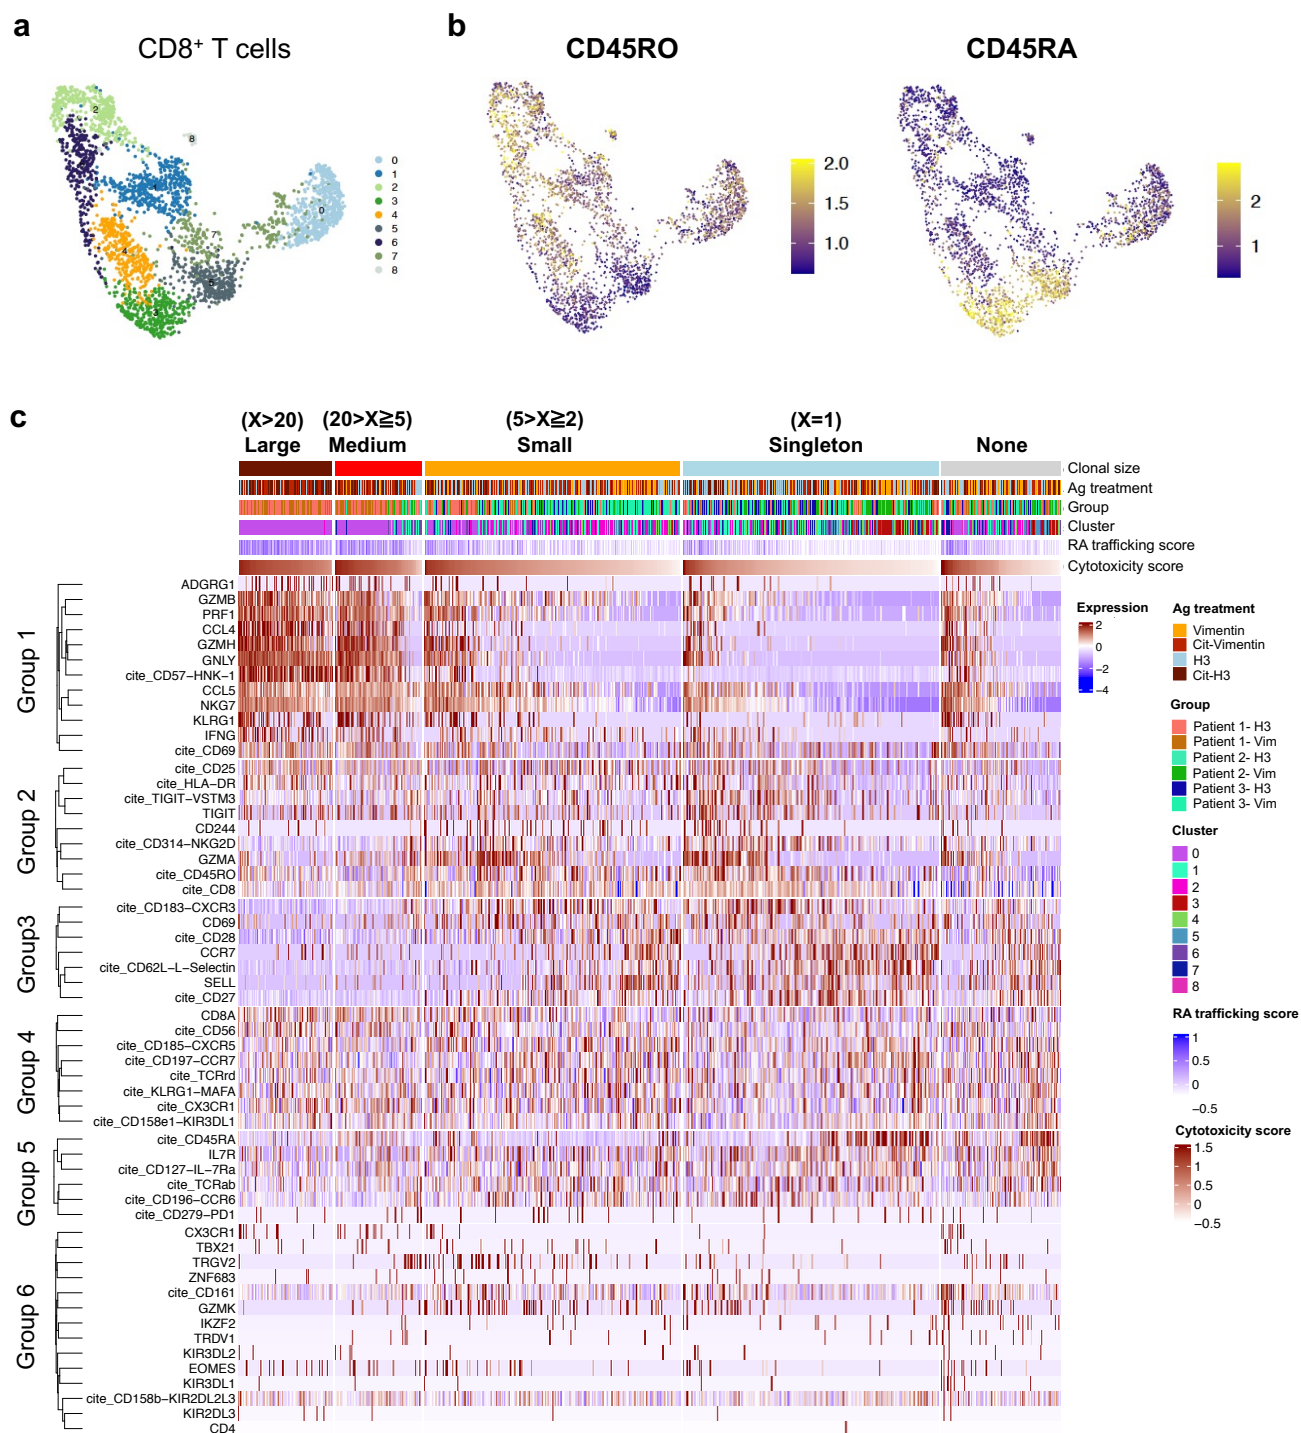

**Supplementary Fig. 11: Phenotype of CD8<sup>+</sup> T cells stimulated by native or citrullinated antigens.** **a** UMAP plot of CD8<sup>+</sup> T cells having 9 transcriptionally different clusters. **b** Expression level of CD45RO and CD45RA CITE-seq antibodies in CD8<sup>+</sup> T cells. **c** Heatmap of 6 groups by unsupervised clustering using the level of RNA and CITE-seq antibodies (cite\_). RA rheumatoid arthritis, Vim vimentin, Cit-citrullinated.

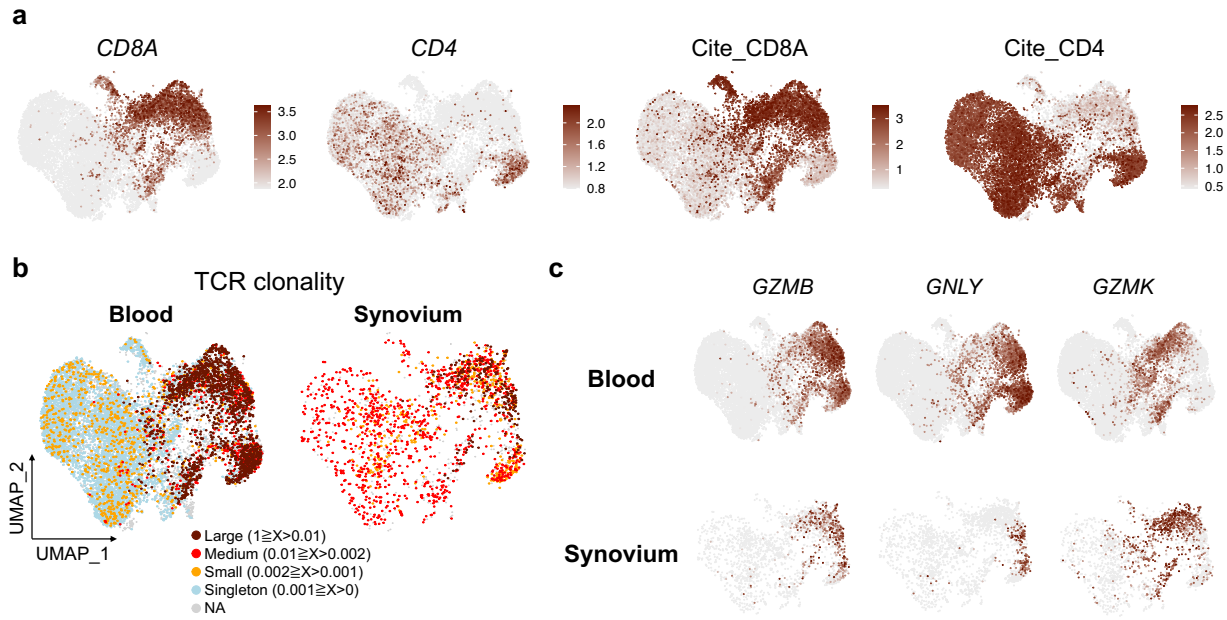

**Supplementary Fig. 12: Integrated analysis of single cell RNA-seq data from paired RA blood and synovium CD8<sup>+</sup> T cells.** **a** UMAP plots representing the expression levels of CD8A and CD4 in mRNA and CITE-seq Abs. **b** UMAP plots of ACPA+ RA blood ( $n = 3$ ) and synovium ( $n = 4$ ) CD8<sup>+</sup> T cells integrated with TCR clonality ( $n = 9,360$  paired  $TCR\alpha\beta$  sequences). Color indicates the groups by the ratio of clonotypes in total cells. **c** UMAP plots showing the expression of *GZMB*, *GNLY* and *GZMK* in integrated blood and synovial CD8<sup>+</sup> T cells. Scale bars represent the normalized expression values. TCR T cell receptor.

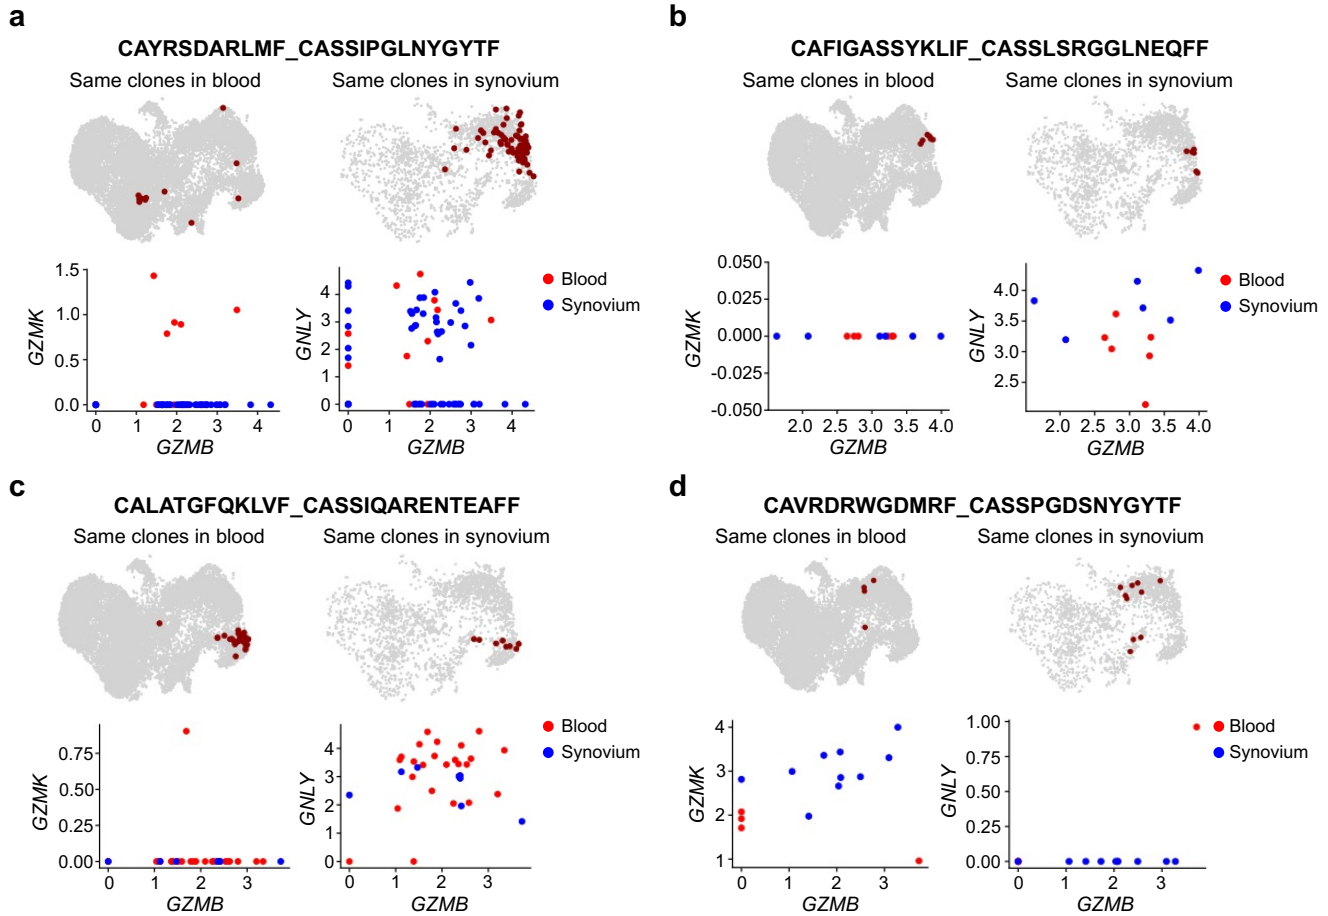

**Supplementary Fig. 13: Shared T cell clonotypes between ACPA+ RA blood and matched synovium. a-d** Mapping of shared clonotypes in the matched blood and synovium from ACPA+ RA patients. The frequent clonotypes are represented as CDR3 alpha-beta sequences. Dot plots show the expression level of *GZMB*, *GZMK*, and/or *GNLY* in the same clonotypes located in either blood (red) and synovium (blue). Source data are provided as a Source Data file.

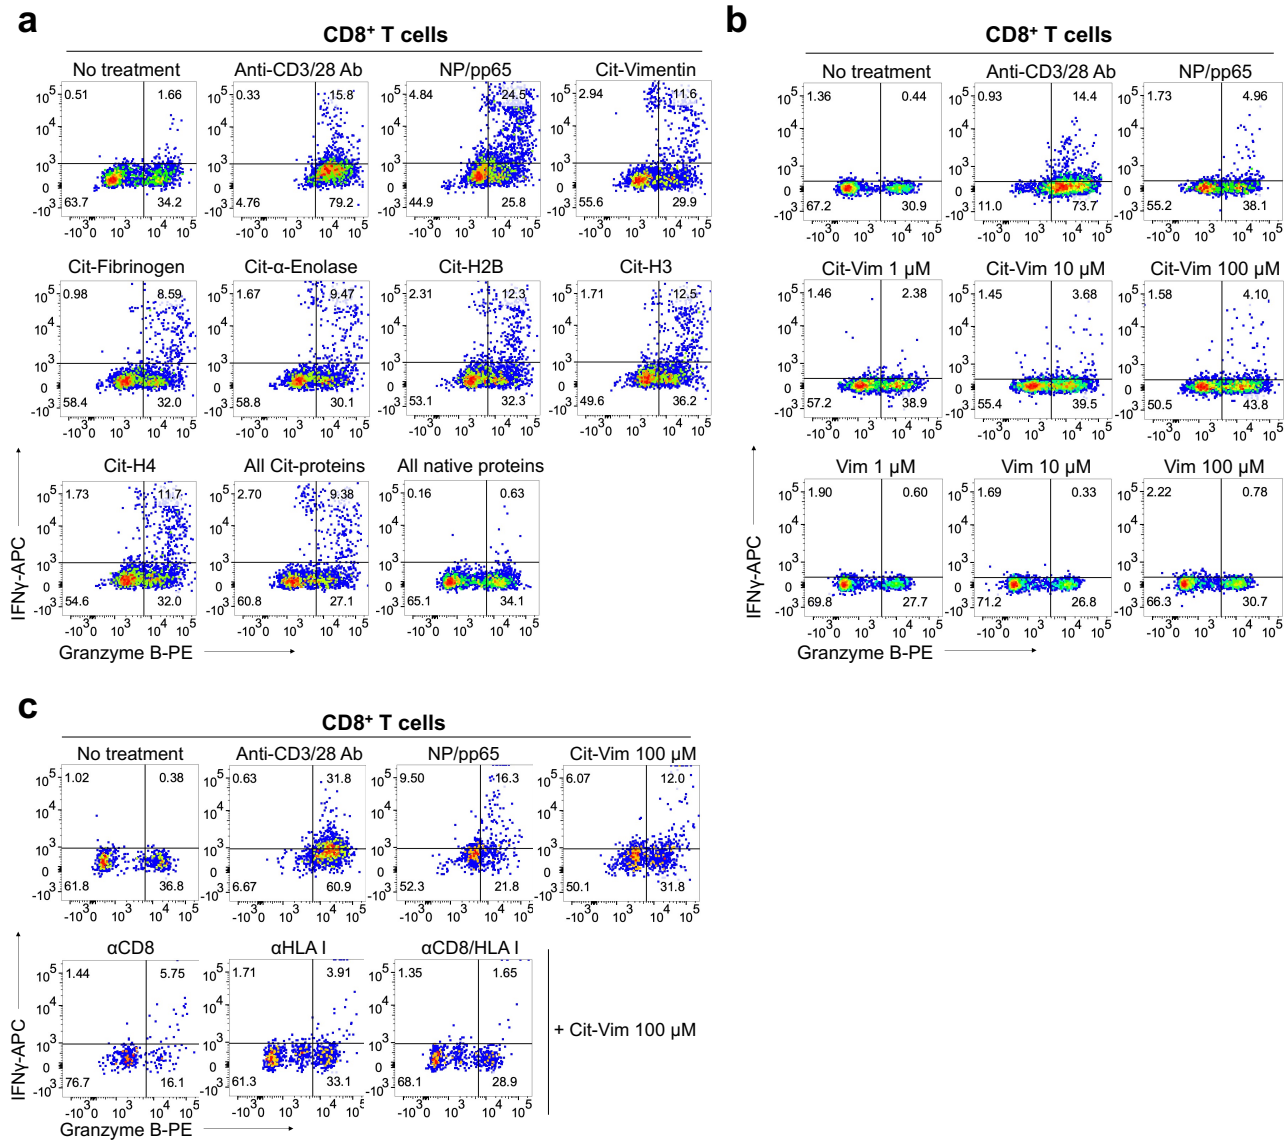

**Supplementary Fig. 14: ACPA<sup>+</sup> RA patient blood CD8<sup>+</sup> T cells are activated by citrullinated proteins in a CD8:HLA class I-dependent manner. a-c** Representative flow cytometric plots of ACPA<sup>+</sup> RA blood CD8<sup>+</sup> T cells stimulated with citrullinated proteins (a), a range of concentrations of cit-vimentin or native vimentin (b), and in the presence of anti-CD8/ HLA class I-blocking antibodies (c). Ab antibody, Vim vimentin, Cit- citrullinated.

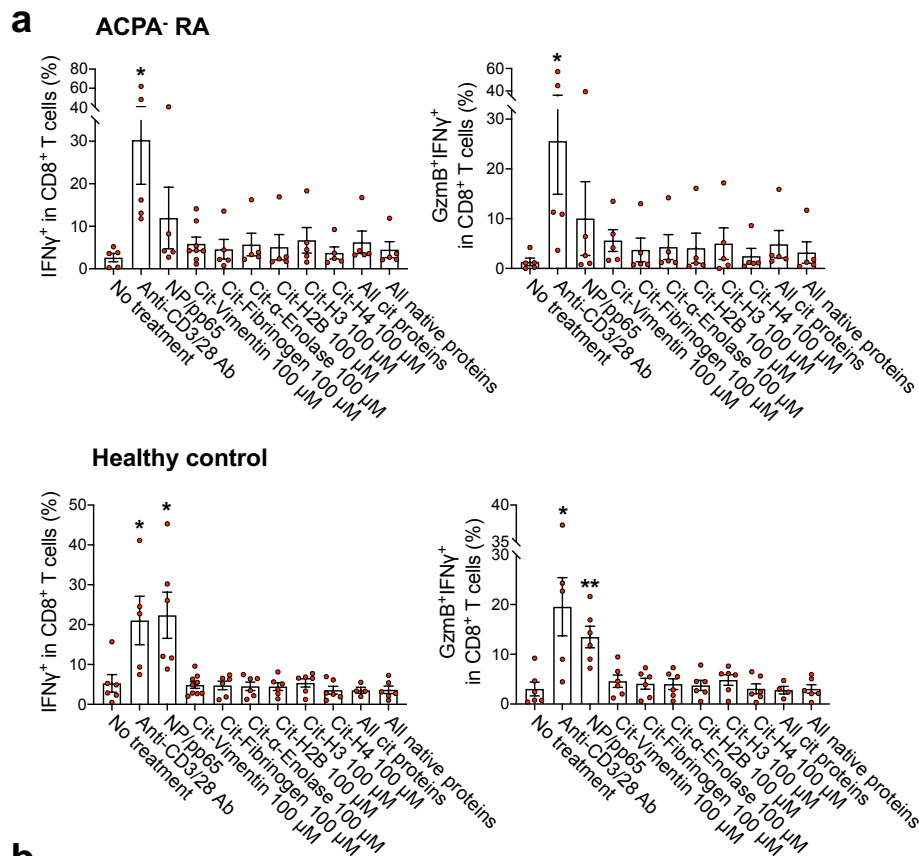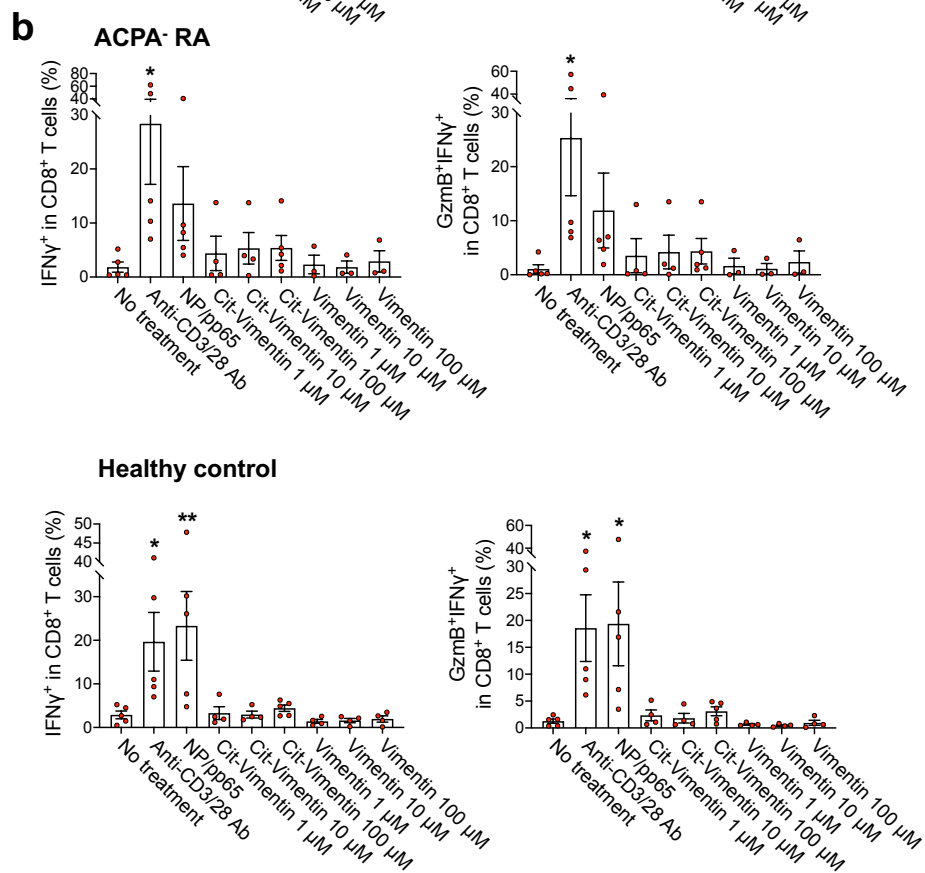

**Supplementary Fig. 15: ACPA- RA patient CD8<sup>+</sup> T cells react with viral but not citrullinated**

**antigens. a** Percentages of IFN $\gamma$  and/ or GzmB-expressing CD8<sup>+</sup> T cells from PBMCs of ACPA- RA or HCs were measured by intracellular staining after stimulation with anti-CD3/28 antibodies, NP (Influenza)/ pp65 (CMV) proteins (50  $\mu$ M of each), citrullinated proteins (vimentin, fibrinogen,  $\alpha$ -enolase, and histones H2B, H3 or H4) (100  $\mu$ M), all citrullinated proteins (20  $\mu$ M each), or all native proteins (20  $\mu$ M each) for 16 hr. For ACPA- RA, no stimulation (n = 5), anti-CD3/28 Abs (n = 5), NP/pp65 (n = 5), cit-vimentin (IFN $\gamma$ <sup>+</sup> n = 8, GzmB<sup>+</sup>IFN $\gamma$ <sup>+</sup> n = 5), cit-fibrinogen,  $\alpha$ -enolase, and histones H2B, H3 or H4 (n = 5), all cit proteins (n = 5), or all native proteins (n = 5); \**P*=0.0296, or \**P*=0.0498. For HC, no stimulation (n = 6), anti-CD3/28 Abs (n = 5), NP/pp65 (n = 6), cit-vimentin (IFN $\gamma$ <sup>+</sup> n = 9, GzmB<sup>+</sup>IFN $\gamma$ <sup>+</sup> n = 6), cit-fibrinogen,  $\alpha$ -enolase, and histones H2B, H3 or H4 (n = 6), all cit proteins (n = 4), or all native proteins (n = 6); \**P*=0.0274, \**P*=0.0201, \**P*=0.0150, or \*\**P*=0.0023. **b** Quantification of IFN $\gamma$ <sup>+</sup> or IFN $\gamma$ <sup>+</sup>GzmB<sup>+</sup> CD8<sup>+</sup> T cells in ACPA- RA or HC PBMCs stimulated for 16 hr with cit-vimentin or native vimentin in a concentration-dependent manner. No stimulation (ACPA- RA and HC n = 5), anti-CD3/28 Abs (ACPA- RA and HC n = 5), NP/pp65 (ACPA- RA and HC n = 5), cit-vimentin 1 or 10  $\mu$ M (ACPA- RA and HC n = 4), cit-vimentin 100  $\mu$ M (ACPA- RA and HC n = 5), vimentin 1,10 or 100  $\mu$ M (ACPA- RA n = 3 and HC n = 4). In ACPA- RA, \**P*=0.0462, or \**P*=0.05. In HC, \**P*=0.0385, \*\**P*=0.033, \**P*=0.024, or \**P*=0.0491. For **a, b**, data are presented as means  $\pm$  SEM. By two-tailed unpaired *t*-test: \**P* < 0.05 or \*\**P* < 0.01 versus no treatment. Source data are provided as a Source Data file. ACPA anti-citrullinated protein antibodies, RA rheumatoid arthritis, Ab antibody.

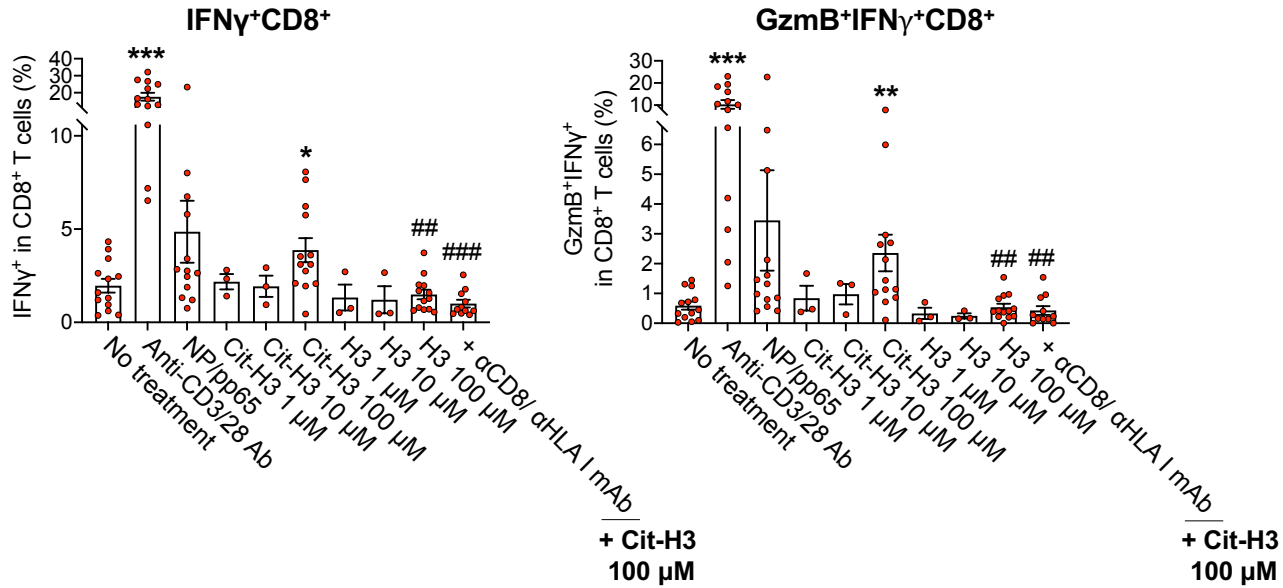

**Supplementary Fig. 16: ACPA+ RA blood CD8<sup>+</sup> T cells react with cit-H3.**

Percentage of IFN $\gamma$  or GzmB expressing CD8<sup>+</sup> T cells in ACPA+ RA blood measured by intracellular staining after stimulation with a range of concentrations of citrullinated histone H3 (cit-H3) or native H3 protein in presence or absence of anti-CD8/HLA class I-blocking antibodies for 16 hrs. No stimulation (n = 13), anti-CD3/28 Abs (n = 13), NP/pp65 (n = 13), cit-H3 or native H3 1 or 10  $\mu$ M (n = 3), cit-H3 or native H3 100  $\mu$ M (n = 13), cit-H3 with anti-CD8/ HLA class I antibodies (n = 11). For IFN $\gamma$ <sup>+</sup>CD8<sup>+</sup>, \*\*\* $P$ <0.0001, \* $P$ =0.0172, ## $P$ =0.0023, or #### $P$ =0.0007. For GzmB<sup>+</sup>IFN $\gamma$ <sup>+</sup>CD8<sup>+</sup>, \*\*\* $P$ <0.0001, \*\* $P$ =0.0098, ## $P$ =0.0077, or ## $P$ =0.0099. Data are presented as means  $\pm$  SEM. By two-tailed unpaired  $t$ -test: \* $P$  < 0.05, \*\* $P$  < 0.01 or \*\*\* $P$  < 0.001 versus no treatment, and ## $P$  < 0.01 or #### $P$  < 0.001 versus cit-H3 100  $\mu$ M.

Source data are provided as a Source Data file. Ab antibody.

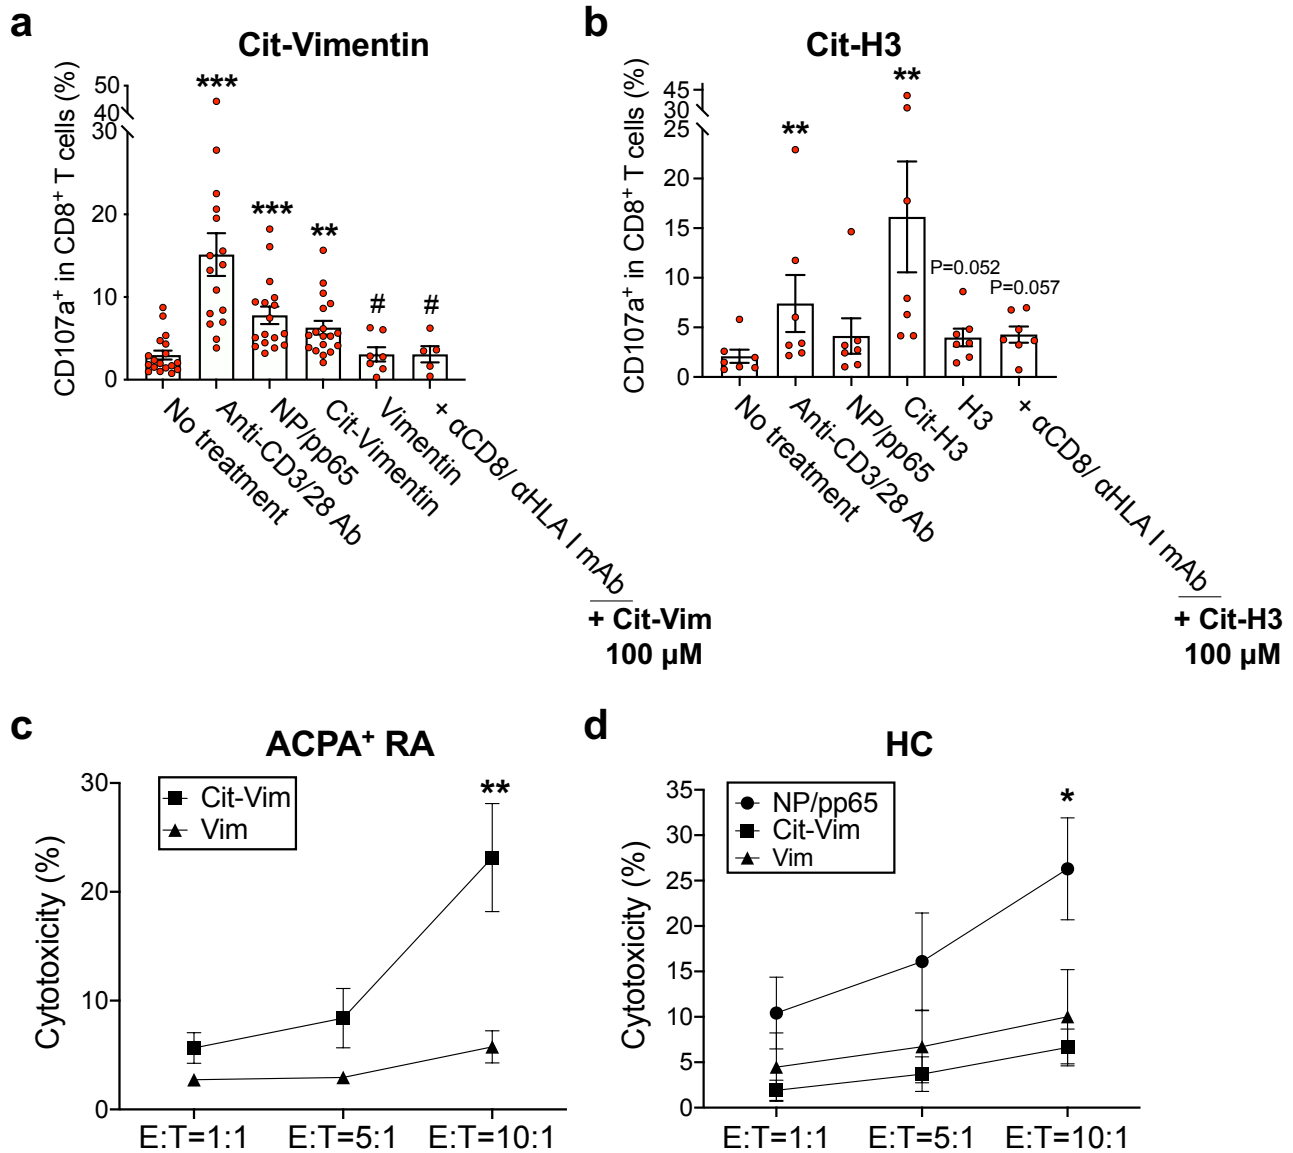

**Supplementary Fig. 17: Citrullinated antigens stimulate ACPA<sup>+</sup> RA blood CD8<sup>+</sup> T cells to exhibit cytotoxic activity and mediate cell killing.** **a, b** Flow cytometry analysis of CD107a<sup>+</sup> expression by CD8<sup>+</sup> T cells was used as a measure of degranulation activity. ACPA<sup>+</sup> RA blood samples were stimulated with citrullinated or native forms of the RA autoantigens vimentin and histone H3 (100 μM each), with or without anti-CD8/ HLA class I-blocking antibodies, and flow cytometry analysis performed to quantitate CD107a<sup>+</sup>CD8<sup>+</sup> T cells. For **(a)**, no stimulation (n = 18), anti-CD3/28 Abs (n = 16), NP/pp65 (n = 17), cit-vimentin (n = 18), vimentin (n = 7), cit-vimentin with anti-CD8/ HLA class I antibodies (n = 5); \*\*\**P* < 0.0001, \*\*\**P* = 0.0003, \*\**P* = 0.0021, #*P* = 0.0364, or #*P* = 0.0494. For **(b)**, n = 7; \*\*\**P* < 0.0001, or \**P* = 0.028. **c, d** Antigen-independent cytotoxic activity of cit-vimentin, native vimentin, or viral protein

stimulated CD8<sup>+</sup> T cells from ACPA+ RA (**c**) or HC (**d**) blood against the DLD-1 cell line was determined using a lactate dehydrogenase (LDH) release assay. For (**c**), cit-vimentin (n = 7) and vimentin (n = 5); \*\**P*=0.0025. For (**d**), NP/pp65 (n = 14), cit-vimentin or vimentin (n = 3). E:T ratio means effector/target cell ratio. Data are presented as means ± SEM. For (**a, b**), using two-tailed unpaired *t*-test: \**P* < 0.05, \*\**P* < 0.01, or \*\*\**P* < 0.001 versus no treatment; #*P* < 0.05 versus cit-vimentin; *P* value represented on the graph was compared with cit-vimentin. For (**c, d**), using two-way ANOVA with Tukey's multiple comparisons test: \*\**P* < 0.01. Source data are provided as a Source Data file. HC healthy control, ACPA anti-citrullinated protein antibodies, RA rheumatoid arthritis, mAb monoclonal antibody, Cit-Vim citrullinated vimentin.

## Supplementary Tables

**Supplementary Table 1. Demographic characteristics of RA patients.**

|                                      | <b>RA patients</b> |
|--------------------------------------|--------------------|
| Total Number                         | 59                 |
| Gender, Female/Male                  | 4/55               |
| Age (years) - mean $\pm$ SD          | 66.15 $\pm$ 12.24  |
| Dis duration (years) - mean $\pm$ SD | 11.35 $\pm$ 10.69  |
| Disease activity                     |                    |
| ACPA positive (%)                    | 76.27              |
| RF positive (%)                      | 73.33              |
| CDAI score - mean $\pm$ SD           | 15.17 $\pm$ 15.95  |
| MTX use (%)                          | 51.11              |
| MTX duration (years)                 | 4.96 $\pm$ 4.9     |

**Supplementary Table 2 Differentially expressed genes in each cluster identified in ACPA+ RA as compared to HC blood.** Differentially expressed genes in each cluster were selected with Log2 Fold change > 0.8. Wilcoxon Rank Sum test and the Benjamini–Hochberg method to adjust the *P* values for multiple testing. Avg average, Pct percentage, p\_val\_adj adjusted *P* value.

| <b>Gene</b>    | <b>Avg_log2FC</b> | <b>Pct.1</b> | <b>Pct.2</b> | <b>p_val_adj</b> | <b>Cluster</b> |
|----------------|-------------------|--------------|--------------|------------------|----------------|
| <i>CCR7</i>    | 2.17188736        | 0.952        | 0.528        | 0                | Naïve          |
| <i>LEF1</i>    | 2.00017763        | 0.954        | 0.652        | 0                | Naïve          |
| <i>ACTN1</i>   | 1.50463023        | 0.94         | 0.711        | 0                | Naïve          |
| <i>NELL2</i>   | 1.42062488        | 0.889        | 0.612        | 0                | Naïve          |
| <i>MAL</i>     | 1.32861183        | 0.804        | 0.643        | 0                | Naïve          |
| <i>LTB</i>     | 1.29286009        | 0.964        | 0.78         | 0                | Naïve          |
| <i>SELL</i>    | 1.25489209        | 0.951        | 0.817        | 0                | Naïve          |
| <i>NOSIP</i>   | 1.2525314         | 0.947        | 0.812        | 0                | Naïve          |
| <i>OXNAD1</i>  | 1.2385171         | 0.956        | 0.681        | 0                | Naïve          |
| <i>PIK3IP1</i> | 1.1523528         | 0.96         | 0.805        | 0                | Naïve          |
| <i>AIF1</i>    | 1.14401643        | 0.867        | 0.767        | 0                | Naïve          |
| <i>TRABD2A</i> | 1.07210543        | 0.915        | 0.757        | 0                | Naïve          |
| <i>LDLRAP1</i> | 1.05680921        | 0.928        | 0.822        | 0                | Naïve          |
| <i>CD27</i>    | 1.03820024        | 0.934        | 0.718        | 0                | Naïve          |
| <i>SPINT2</i>  | 1.02349056        | 0.967        | 0.724        | 0                | Naïve          |
| <i>SNHG8</i>   | 0.99485116        | 0.993        | 0.924        | 0                | Naïve          |
| <i>NDFIP1</i>  | 0.97624462        | 0.986        | 0.869        | 0                | Naïve          |
| <i>ABLIM1</i>  | 0.96524899        | 0.787        | 0.402        | 0                | Naïve          |
| <i>CD8B</i>    | 0.90637784        | 0.98         | 0.9          | 0                | Naïve          |
| <i>CAMK4</i>   | 0.85677228        | 0.958        | 0.737        | 0                | Naïve          |
| <i>ARMH1</i>   | 0.82194778        | 0.793        | 0.738        | 0                | Naïve          |
| <i>HSPB1</i>   | 0.79107008        | 0.972        | 0.821        | 0                | Naïve          |
| <i>PCED1B</i>  | 0.76851258        | 0.867        | 0.737        | 0                | Naïve          |
| <i>RCAN3</i>   | 0.74887121        | 0.782        | 0.717        | 0                | Naïve          |
| <i>LDHB</i>    | 0.74089477        | 0.961        | 0.907        | 0                | Naïve          |
| <i>TCF7</i>    | 0.95014837        | 0.841        | 0.758        | 3.76E-301        | Naïve          |
| <i>CD55</i>    | 0.86560341        | 0.88         | 0.786        | 3.17E-286        | Naïve          |
| <i>SATB1</i>   | 0.76575809        | 0.749        | 0.593        | 1.77E-205        | Naïve          |
| <i>FLT3LG</i>  | 0.71486197        | 0.879        | 0.791        | 1.39E-199        | Naïve          |
| <i>SI00B</i>   | 0.81117364        | 0.72         | 0.75         | 1.09E-184        | Naïve          |

|                 |            |       |       |           |                    |
|-----------------|------------|-------|-------|-----------|--------------------|
| <i>FGFBP2</i>   | 2.64092332 | 0.994 | 0.896 | 0         | <i>GZMB+ GNLY+</i> |
| <i>GZMH</i>     | 2.48081498 | 0.982 | 0.899 | 0         | <i>GZMB+ GNLY+</i> |
| <i>GNLY</i>     | 2.2873411  | 0.956 | 0.666 | 0         | <i>GZMB+ GNLY+</i> |
| <i>GZMB</i>     | 2.20826241 | 0.949 | 0.829 | 0         | <i>GZMB+ GNLY+</i> |
| <i>ZNF683</i>   | 1.93895227 | 0.954 | 0.888 | 0         | <i>GZMB+ GNLY+</i> |
| <i>NKG7</i>     | 1.86436384 | 0.999 | 0.888 | 0         | <i>GZMB+ GNLY+</i> |
| <i>PRF1</i>     | 1.71556813 | 0.988 | 0.773 | 0         | <i>GZMB+ GNLY+</i> |
| <i>ADGRG1</i>   | 1.69693841 | 0.956 | 0.796 | 0         | <i>GZMB+ GNLY+</i> |
| <i>LGALS1</i>   | 1.62412354 | 0.905 | 0.789 | 0         | <i>GZMB+ GNLY+</i> |
| <i>SPON2</i>    | 1.56725113 | 0.933 | 0.694 | 0         | <i>GZMB+ GNLY+</i> |
| <i>PRSS23</i>   | 1.46520941 | 0.945 | 0.865 | 0         | <i>GZMB+ GNLY+</i> |
| <i>FCGR3A</i>   | 1.40710564 | 0.927 | 0.738 | 0         | <i>GZMB+ GNLY+</i> |
| <i>CX3CR1</i>   | 1.31747937 | 0.874 | 0.788 | 0         | <i>GZMB+ GNLY+</i> |
| <i>ZEB2</i>     | 1.29236084 | 0.834 | 0.797 | 0         | <i>GZMB+ GNLY+</i> |
| <i>PLEK</i>     | 1.27834466 | 0.87  | 0.707 | 0         | <i>GZMB+ GNLY+</i> |
| <i>CST7</i>     | 1.25537403 | 0.993 | 0.952 | 0         | <i>GZMB+ GNLY+</i> |
| <i>CCL4</i>     | 1.25062717 | 0.856 | 0.876 | 0         | <i>GZMB+ GNLY+</i> |
| <i>ITGB1</i>    | 1.21597628 | 0.94  | 0.911 | 0         | <i>GZMB+ GNLY+</i> |
| <i>KLRD1</i>    | 1.21207058 | 0.915 | 0.787 | 0         | <i>GZMB+ GNLY+</i> |
| <i>EFHD2</i>    | 1.17334611 | 0.876 | 0.717 | 0         | <i>GZMB+ GNLY+</i> |
| <i>FCRL6</i>    | 1.15172947 | 0.935 | 0.93  | 0         | <i>GZMB+ GNLY+</i> |
| <i>TBX21</i>    | 1.15137019 | 0.938 | 0.891 | 0         | <i>GZMB+ GNLY+</i> |
| <i>GZMA</i>     | 1.14945792 | 0.986 | 0.847 | 0         | <i>GZMB+ GNLY+</i> |
| <i>SI00A4</i>   | 1.13366146 | 0.995 | 0.937 | 0         | <i>GZMB+ GNLY+</i> |
| <i>ITGB2</i>    | 1.07810461 | 0.995 | 0.959 | 0         | <i>GZMB+ GNLY+</i> |
| <i>FLNA</i>     | 1.06917519 | 0.974 | 0.941 | 0         | <i>GZMB+ GNLY+</i> |
| <i>SIPR5</i>    | 1.01688766 | 0.906 | 0.847 | 0         | <i>GZMB+ GNLY+</i> |
| <i>SLC9A3R1</i> | 0.98919573 | 0.974 | 0.894 | 0         | <i>GZMB+ GNLY+</i> |
| <i>CCL5</i>     | 0.97731527 | 0.994 | 0.97  | 0         | <i>GZMB+ GNLY+</i> |
| <i>HOPX</i>     | 0.97559354 | 0.913 | 0.871 | 0         | <i>GZMB+ GNLY+</i> |
| <i>FCGR3A</i>   | 1.78521332 | 0.98  | 0.784 | 3.47E-253 | <i>GZMB+ KIR+</i>  |
| <i>TTC38</i>    | 1.06213688 | 0.961 | 0.761 | 3.68E-205 | <i>GZMB+ KIR+</i>  |
| <i>KIR3DL2</i>  | 0.78538508 | 0.816 | 0.57  | 4.05E-177 | <i>GZMB+ KIR+</i>  |
| <i>TRDV1</i>    | 1.75850042 | 0.823 | 0.758 | 3.73E-166 | <i>GZMB+ KIR+</i>  |
| <i>NKG7</i>     | 1.08540583 | 0.999 | 0.916 | 6.13E-161 | <i>GZMB+ KIR+</i>  |
| <i>SIPR5</i>    | 0.96269525 | 0.953 | 0.86  | 1.03E-154 | <i>GZMB+ KIR+</i>  |
| <i>GZMB</i>     | 1.12077486 | 0.971 | 0.859 | 1.27E-147 | <i>GZMB+ KIR+</i>  |
| <i>KLRC3</i>    | 1.17386824 | 0.793 | 0.594 | 2.35E-140 | <i>GZMB+ KIR+</i>  |
| <i>ADGRG1</i>   | 0.93451484 | 0.941 | 0.837 | 1.72E-135 | <i>GZMB+ KIR+</i>  |

|                |            |       |       |           |                   |
|----------------|------------|-------|-------|-----------|-------------------|
| <i>CST7</i>    | 0.93584796 | 0.991 | 0.962 | 1.76E-130 | <i>GZMB+ KIR+</i> |
| <i>PRF1</i>    | 1.01856434 | 0.989 | 0.828 | 4.97E-124 | <i>GZMB+ KIR+</i> |
| <i>TBX21</i>   | 0.78939386 | 0.944 | 0.903 | 1.23E-123 | <i>GZMB+ KIR+</i> |
| <i>C1orf21</i> | 0.7426384  | 0.904 | 0.855 | 7.30E-122 | <i>GZMB+ KIR+</i> |
| <i>KLRD1</i>   | 1.06721614 | 0.936 | 0.819 | 3.51E-117 | <i>GZMB+ KIR+</i> |
| <i>FGR</i>     | 0.87854003 | 0.909 | 0.886 | 2.99E-115 | <i>GZMB+ KIR+</i> |
| <i>FCRL6</i>   | 0.8177497  | 0.964 | 0.93  | 9.00E-114 | <i>GZMB+ KIR+</i> |
| <i>FGFBP2</i>  | 0.8305155  | 0.983 | 0.922 | 9.59E-108 | <i>GZMB+ KIR+</i> |
| <i>CCL5</i>    | 0.78234757 | 0.995 | 0.976 | 9.86E-99  | <i>GZMB+ KIR+</i> |
| <i>PLEK</i>    | 0.84156567 | 0.912 | 0.747 | 7.33E-93  | <i>GZMB+ KIR+</i> |
| <i>GZMH</i>    | 0.76278171 | 0.967 | 0.921 | 9.21E-89  | <i>GZMB+ KIR+</i> |
| <i>CMC1</i>    | 0.83244954 | 0.816 | 0.632 | 8.14E-75  | <i>GZMB+ KIR+</i> |
| <i>CCL4</i>    | 0.8534083  | 0.916 | 0.868 | 2.86E-68  | <i>GZMB+ KIR+</i> |
| <i>IKZF2</i>   | 0.77393067 | 0.693 | 0.574 | 4.91E-65  | <i>GZMB+ KIR+</i> |
| <i>TIGIT</i>   | 1.00714799 | 0.741 | 0.696 | 9.89E-58  | <i>GZMB+ KIR+</i> |
| <i>ZEB2</i>    | 0.80594977 | 0.82  | 0.807 | 3.56E-55  | <i>GZMB+ KIR+</i> |
| <i>CD63</i>    | 0.7813272  | 0.859 | 0.812 | 1.37E-53  | <i>GZMB+ KIR+</i> |
| <i>GNLY</i>    | 0.80162342 | 0.881 | 0.744 | 2.43E-53  | <i>GZMB+ KIR+</i> |
| <i>KLRF1</i>   | 0.93276105 | 0.648 | 0.531 | 5.53E-38  | <i>GZMB+ KIR+</i> |
| <i>NCR1</i>    | 0.82343017 | 0.592 | 0.417 | 5.63E-19  | <i>GZMB+ KIR+</i> |
| <i>TYROBP</i>  | 0.84125194 | 0.66  | 0.688 | 3.20E-12  | <i>GZMB+ KIR+</i> |
| <i>TRDV2</i>   | 1.99128693 | 0.913 | 0.407 | 0         | <i>TCRgd+</i>     |
| <i>TRGV9</i>   | 1.92133086 | 0.852 | 0.666 | 1.24E-221 | <i>TCRgd+</i>     |
| <i>TYROBP</i>  | 1.33879925 | 0.875 | 0.677 | 2.75E-189 | <i>TCRgd+</i>     |
| <i>MAP3K8</i>  | 0.63507239 | 0.974 | 0.865 | 1.50E-171 | <i>TCRgd+</i>     |
| <i>SI00B</i>   | 0.62382483 | 0.867 | 0.736 | 5.13E-162 | <i>TCRgd+</i>     |
| <i>DUSP2</i>   | 1.05992088 | 0.996 | 0.965 | 4.05E-146 | <i>TCRgd+</i>     |
| <i>KLRB1</i>   | 1.04734785 | 0.882 | 0.763 | 1.68E-121 | <i>TCRgd+</i>     |
| <i>MATK</i>    | 0.71312879 | 0.949 | 0.881 | 6.32E-108 | <i>TCRgd+</i>     |
| <i>KLRG1</i>   | 0.85459333 | 0.913 | 0.73  | 2.58E-103 | <i>TCRgd+</i>     |
| <i>KLRD1</i>   | 0.77247908 | 0.933 | 0.819 | 1.04E-102 | <i>TCRgd+</i>     |
| <i>ID2</i>     | 0.92916918 | 0.965 | 0.78  | 3.99E-97  | <i>TCRgd+</i>     |
| <i>ALOX5AP</i> | 0.80492512 | 0.915 | 0.815 | 1.02E-71  | <i>TCRgd+</i>     |
| <i>GNLY</i>    | 0.74442669 | 0.879 | 0.743 | 5.58E-71  | <i>TCRgd+</i>     |
| <i>CST7</i>    | 0.58130969 | 0.99  | 0.962 | 1.93E-64  | <i>TCRgd+</i>     |
| <i>NKG7</i>    | 0.57142342 | 0.998 | 0.916 | 3.11E-63  | <i>TCRgd+</i>     |
| <i>DUSP1</i>   | 0.82391136 | 0.98  | 0.889 | 2.01E-61  | <i>TCRgd+</i>     |
| <i>KRT10</i>   | 0.55492149 | 0.988 | 0.941 | 6.52E-59  | <i>TCRgd+</i>     |
| <i>TRDC</i>    | 1.1402084  | 0.663 | 0.562 | 4.61E-51  | <i>TCRgd+</i>     |

|                 |            |       |       |           |               |
|-----------------|------------|-------|-------|-----------|---------------|
| <i>PRELID1</i>  | 0.56047116 | 0.969 | 0.858 | 2.82E-46  | <i>TCRgd+</i> |
| <i>ANXA1</i>    | 0.52941704 | 0.973 | 0.894 | 4.07E-45  | <i>TCRgd+</i> |
| <i>APOBEC3G</i> | 0.53168543 | 0.853 | 0.825 | 6.76E-42  | <i>TCRgd+</i> |
| <i>ZFP36</i>    | 0.52644306 | 0.981 | 0.916 | 3.04E-38  | <i>TCRgd+</i> |
| <i>IL2RB</i>    | 0.53117476 | 0.928 | 0.861 | 1.33E-31  | <i>TCRgd+</i> |
| <i>CD300A</i>   | 0.51766821 | 0.7   | 0.544 | 1.28E-24  | <i>TCRgd+</i> |
| <i>NCR3</i>     | 0.5182753  | 0.65  | 0.648 | 2.80E-12  | <i>TCRgd+</i> |
| <i>TRGC1</i>    | 0.68535161 | 0.565 | 0.393 | 4.71E-10  | <i>TCRgd+</i> |
| <i>KLRC1</i>    | 0.58682728 | 0.394 | 0.33  | 7.14E-06  | <i>TCRgd+</i> |
| <i>GZMK</i>     | 1.99717379 | 0.895 | 0.768 | 0         | <i>GZMK+</i>  |
| <i>DUSP2</i>    | 1.35848465 | 0.991 | 0.96  | 0         | <i>GZMK+</i>  |
| <i>CD74</i>     | 1.07464734 | 0.946 | 0.907 | 0         | <i>GZMK+</i>  |
| <i>COTL1</i>    | 0.66638748 | 0.93  | 0.872 | 7.40E-248 | <i>GZMK+</i>  |
| <i>RGS1</i>     | 0.83275317 | 0.705 | 0.643 | 9.78E-207 | <i>GZMK+</i>  |
| <i>FYN</i>      | 0.81771733 | 0.904 | 0.784 | 1.04E-193 | <i>GZMK+</i>  |
| <i>CMC1</i>     | 1.0803568  | 0.754 | 0.615 | 1.22E-184 | <i>GZMK+</i>  |
| <i>CCL4</i>     | 0.63132847 | 0.892 | 0.866 | 3.33E-149 | <i>GZMK+</i>  |
| <i>CCL5</i>     | 0.52091684 | 0.989 | 0.975 | 5.05E-143 | <i>GZMK+</i>  |
| <i>LYAR</i>     | 0.58186799 | 0.882 | 0.839 | 3.17E-104 | <i>GZMK+</i>  |
| <i>IL10RA</i>   | 0.51340213 | 0.945 | 0.897 | 4.31E-87  | <i>GZMK+</i>  |
| <i>TIGIT</i>    | 0.68709491 | 0.686 | 0.701 | 1.23E-81  | <i>GZMK+</i>  |
| <i>LYST</i>     | 0.56801848 | 0.693 | 0.615 | 2.91E-77  | <i>GZMK+</i>  |
| <i>PIK3R1</i>   | 0.57399294 | 0.74  | 0.748 | 1.04E-46  | <i>GZMK+</i>  |
| <i>LTB</i>      | 1.07119384 | 0.977 | 0.804 | 0         | Memory        |
| <i>IL7R</i>     | 1.03381631 | 0.981 | 0.791 | 0         | Memory        |
| <i>COTL1</i>    | 0.76448942 | 0.959 | 0.871 | 0         | Memory        |
| <i>CAPG</i>     | 0.55036677 | 0.898 | 0.714 | 0         | Memory        |
| <i>AQP3</i>     | 0.54135708 | 0.898 | 0.798 | 5.71E-169 | Memory        |
| <i>LGALS3</i>   | 0.58233773 | 0.816 | 0.783 | 2.94E-168 | Memory        |
| <i>JUNB</i>     | 0.65509324 | 0.997 | 0.977 | 3.32E-153 | Memory        |
| <i>ARHGAP15</i> | 0.76563726 | 0.913 | 0.809 | 2.03E-151 | Memory        |
| <i>PTGER2</i>   | 0.55948452 | 0.912 | 0.815 | 5.78E-145 | Memory        |
| <i>LDHB</i>     | 0.60480366 | 0.963 | 0.915 | 1.60E-143 | Memory        |
| <i>CXCR3</i>    | 0.64707736 | 0.868 | 0.738 | 4.90E-143 | Memory        |
| <i>FXD2</i>     | 0.72697369 | 0.762 | 0.702 | 1.39E-142 | Memory        |
| <i>FOS</i>      | 0.59514237 | 0.921 | 0.784 | 6.91E-139 | Memory        |
| <i>TIMP1</i>    | 0.619823   | 0.838 | 0.698 | 3.64E-115 | Memory        |
| <i>PLP2</i>     | 0.68495292 | 0.86  | 0.759 | 9.64E-105 | Memory        |
| <i>TCF7</i>     | 0.53829795 | 0.884 | 0.763 | 1.00E-100 | Memory        |

|                |            |       |       |           |                     |
|----------------|------------|-------|-------|-----------|---------------------|
| <i>KLRB1</i>   | 2.46140509 | 0.967 | 0.757 | 0         | <i>CCR6+ CD161+</i> |
| <i>LST1</i>    | 0.65603783 | 0.865 | 0.596 | 1.93E-208 | <i>CCR6+ CD161+</i> |
| <i>IL7R</i>    | 1.23562461 | 0.984 | 0.806 | 4.41E-207 | <i>CCR6+ CD161+</i> |
| <i>DPP4</i>    | 0.91774681 | 0.888 | 0.701 | 1.12E-188 | <i>CCR6+ CD161+</i> |
| <i>TYROBP</i>  | 1.19564119 | 0.884 | 0.675 | 1.58E-184 | <i>CCR6+ CD161+</i> |
| <i>MYC</i>     | 0.7221775  | 0.942 | 0.667 | 4.50E-178 | <i>CCR6+ CD161+</i> |
| <i>TTC39C</i>  | 0.78485329 | 0.964 | 0.854 | 2.13E-173 | <i>CCR6+ CD161+</i> |
| <i>GZMK</i>    | 1.10947754 | 0.925 | 0.783 | 1.66E-162 | <i>CCR6+ CD161+</i> |
| <i>NFKB1A</i>  | 1.35943949 | 0.936 | 0.831 | 2.11E-147 | <i>CCR6+ CD161+</i> |
| <i>NCR3</i>    | 1.36753518 | 0.838 | 0.637 | 1.26E-143 | <i>CCR6+ CD161+</i> |
| <i>DUSP1</i>   | 1.12077918 | 0.982 | 0.888 | 3.22E-142 | <i>CCR6+ CD161+</i> |
| <i>AQP3</i>    | 1.08914582 | 0.927 | 0.804 | 1.39E-133 | <i>CCR6+ CD161+</i> |
| <i>LGALS3</i>  | 0.95770062 | 0.805 | 0.786 | 3.32E-125 | <i>CCR6+ CD161+</i> |
| <i>SLAMF1</i>  | 0.66166051 | 0.811 | 0.609 | 1.59E-108 | <i>CCR6+ CD161+</i> |
| <i>ALOX5AP</i> | 0.97222512 | 0.922 | 0.813 | 6.24E-106 | <i>CCR6+ CD161+</i> |
| <i>GCHFR</i>   | 0.84474297 | 0.805 | 0.628 | 2.54E-105 | <i>CCR6+ CD161+</i> |
| <i>KLRG1</i>   | 0.91738742 | 0.904 | 0.73  | 1.29E-93  | <i>CCR6+ CD161+</i> |
| <i>CXCR6</i>   | 0.89331155 | 0.719 | 0.547 | 7.54E-90  | <i>CCR6+ CD161+</i> |
| <i>CCR6</i>    | 0.81160558 | 0.728 | 0.758 | 1.09E-88  | <i>CCR6+ CD161+</i> |
| <i>LTB</i>     | 0.80620585 | 0.967 | 0.817 | 1.07E-75  | <i>CCR6+ CD161+</i> |
| <i>ZBTB16</i>  | 0.90784986 | 0.697 | 0.641 | 6.60E-71  | <i>CCR6+ CD161+</i> |
| <i>CD69</i>    | 0.83337076 | 0.925 | 0.84  | 3.02E-52  | <i>CCR6+ CD161+</i> |
| <i>GBP5</i>    | 0.60826196 | 0.851 | 0.675 | 5.81E-48  | <i>CCR6+ CD161+</i> |
| <i>FOS</i>     | 0.65314205 | 0.928 | 0.794 | 1.06E-43  | <i>CCR6+ CD161+</i> |
| <i>ERN1</i>    | 0.83350715 | 0.73  | 0.697 | 4.33E-36  | <i>CCR6+ CD161+</i> |
| <i>SLC4A10</i> | 0.89645098 | 0.615 | 0.378 | 8.03E-31  | <i>CCR6+ CD161+</i> |
| <i>JAML</i>    | 0.6162617  | 0.669 | 0.581 | 7.01E-29  | <i>CCR6+ CD161+</i> |
| <i>ZFP36L1</i> | 0.69958413 | 0.82  | 0.735 | 5.53E-26  | <i>CCR6+ CD161+</i> |
| <i>TMIGD2</i>  | 0.72239382 | 0.697 | 0.714 | 9.21E-26  | <i>CCR6+ CD161+</i> |
| <i>DDIT4</i>   | 0.7047064  | 0.984 | 0.947 | 1.59E-17  | <i>CCR6+ CD161+</i> |

**Supplementary Table 3. HLA typing of ACPA+ RA patients. 12 ACPA+ RA patients were randomly selected and sequenced to get HLA types.**

| Sample ID | A/1              | A/2              | B/1                     | B/2                            | C/1              | C/2              |
|-----------|------------------|------------------|-------------------------|--------------------------------|------------------|------------------|
| JG330     | A*29:02:01:01    | A*32:01:01:01    | B*35:03:01:01           | B*44:02:01:01                  | C*12:03:01:01    | C*05:01:01:02    |
| JG331     | A*24:07:01       | A*11:02:01       | B*15:35                 | B*55:02:01:03                  | C*07:02:01:01    | C*01:02:01:01    |
| JG332     | A*24:02:01:01    | A*01:01:01:01    | B*27:05:02:05           | B*08:01:01:01                  | C*02:02:02:01    | C*07:01:01:01    |
| JG127     | A*03:01:01:01    | A*01:01:01:01    | B*35:01:01:05           | B*52:01:01:02                  | C*04:01:01:11    | C*12:02:02:01    |
| JG128     | A*23:01:01:01    | A*11:01:01:01    | B*07:02:01:01           | B*35:01:01:05                  | C*07:02:01:03    | C*04:01:01:01    |
| JG129     | A*23:01:01:01    | A*68:01:01:02    | B*49:01:01:01           | B*15:220:01:01                 | C*07:01:01:16    | C*04:01:01:01    |
| JG143     | A*02:01:01:01    | A*74:01:01:01    | B*42:01:01              | B*27:05:02:01                  | C*17:01:01:02    | C*15:02:01:01    |
| JG147     | A*11:01:01:01    | A*02:06:01:01    | B*40:01:02:01           | B*51:01:01:05                  | C*03:04:01:02    | C*15:02:01:03    |
| JG149     | A*24:02:01:01    | A*31:01:02:01    | B*08:01:01:01           | B*57:01:01:01                  | C*07:01:01:01    | C*06:02:01:01    |
| JG159     | A*29:02:01:02    | A*29:02:01:01    | B*45:01:01:01           | B*44:03:01:01                  | C*06:02:01:01    | C*16:01:01:01    |
| JG262     | A*03:01:01:01    | A*01:01:01:01    | B*40:01:02:01           | B*08:01:01:01                  | C*03:04:01:01    | C*07:01:01:01    |
| JG272     | A*30:01:01:01    | A*30:01:01:01    | B*53:01:01:01           | B*44:03:01:10                  | C*04:01:01:14    | C*17:01:01:02    |
| Sample ID | DPA1/1           | DPA1/2           | DPB1/1                  | DPB1/2                         | DQA1/1           | DQA1/2           |
| JG330     | DPA1*02:02:02:01 | DPA1*01:03:01:05 | DPB1*05:01:01:01        | DPB1*04:02:01:02               | DQA1*03:01:01    | DQA1*05:05:01:02 |
| JG331     | DPA1*02:02:02:01 | X                | DPB1*05:01:01:01        | DPB1*01:01:01:04               | DQA1*03:03:01:02 | DQA1*06:01:01:02 |
| JG332     | DPA1*01:03:01:01 | DPA1*1:03:01:05  | DPB1*02:01:02:05/416:01 | DPB1*04:02:01:02/105:01/665:01 | DQA1*03:01:01    | DQA1*01:01:01:05 |
| JG127     | DPA1*01:03:01:04 | DPA1*01:03:01:02 | DPB1*04:01:01:06        | DPB1*04:01:01:05               | DQA1*01:01:01:05 | DQA1*03:01:01    |
| JG128     | DPA1*02:06       | DPA1*01:03:01:04 | DPB1*04:01:01:06        | DPB1*04:01:01:05               | DQA1*01:02:01:03 | DQA1*03:01:01    |
| JG129     | DPA1*02:01:08:02 | DPA1*02:01:01:01 | DPB1*01:01:01:01        | DPB1*11:01:01:01               | DQA1*03:03:01:01 | DQA1*01:02:01:04 |
| JG143     | DPA1*02:01:08:02 | DPA1*01:03:01:01 | DPB1*01:01:01:01        | DPB1*02:01:02:05               | DQA1*04:01:01:04 | DQA1*04:01:01:02 |
| JG147     | DPA1*02:02:02:01 | DPA1*02:02:02:01 | DPB1*05:01:01:01        | DPB1*03:01:01:01               | DQA1*03:03:01:03 | DQA1*03:03:01:03 |
| JG149     | DPA1*01:03:01:04 | DPA1*01:03:01:02 | DPB1*04:01:01:06        | DPB1*04:01:01:05               | DQA1*05:01:01:02 | DQA1*03:03:01:01 |
| JG159     | DPA1*01:03:01:02 | DPA1*01:03:01:01 | DPB1*16:01:01:01        | DPB1*04:01:01:05               | DQA1*03:03:01:01 | DQA1*02:01:01:01 |
| JG262     | DPA1*01:03:01:03 | DPA1*01:03:01:02 | DPB1*03:01:01:01        | DPB1*04:01:01:05               | DQA1*03:01:01    | DQA1*05:01:01:02 |
| JG272     | DPA1*01:03:01:02 | DPA1*02:01:08:02 | DPB1*104:01:01:01       | DPB1*01:01:01:01               | DQA1*01:02:01:03 | DQA1*05:05:01:01 |
| Sample ID | DQB1/1           | DQB1/2           | DRB1/1                  | DRB1/2                         | DRB345/1         | DRB345/2         |
| JG330     | DQB1*03:02:01:01 | DQB1*03:01:01:03 | DRB1*04:01:01:03        | DRB1*11:04:01                  | DRB4*01:03:01:10 | DRB3*02:02:01:04 |
| JG331     | DQB1*04:02:01:09 | DQB1*03:01:01:12 | DRB1*04:05:01:01        | DRB1*12:02:01:01               | DRB4*01:03:01:01 | DRB3*03:01:03    |
| JG332     | DQB1*03:02:01:01 | DQB1*05:01:01:03 | DRB1*04:01:01:03        | DRB1*01:01:01                  | DRB4*01:03:01:10 | Absent           |

|              |                      |                      |                  |                  |                      |                      |
|--------------|----------------------|----------------------|------------------|------------------|----------------------|----------------------|
| <b>JG127</b> | DQB1*05:01:0<br>1:03 | DQB1*03:02:0<br>1:02 | DRB1*01:01:01    | DRB1*04:04:01    | DRB4*01:03:0<br>3    | Absent               |
| <b>JG128</b> | DQB1*06:02:0<br>1:01 | DQB1*03:02:0<br>1:02 | DRB1*15:01:01:05 | DRB1*04:04:01    | DRB5*01:01:0<br>1:01 | DRB4*01:03:0<br>1:01 |
| <b>JG129</b> | DQB1*02:02:0<br>1:02 | DQB1*05:01:0<br>1:03 | DRB1*09:01:02:01 | DRB1*13:02:01:02 | DRB4*01:01:0<br>1:01 | DRB3*03:01:0<br>1:01 |
| <b>JG143</b> | DQB1*04:02:0<br>1:08 | DQB1*04:02:0<br>1:04 | DRB1*08:11       | DRB1*03:02:01    | DRB3*01:62           | Absent               |
| <b>JG147</b> | DQB1*04:01:0<br>1:02 | DQB1*04:01:0<br>1:02 | DRB1*04:05:01:03 | DRB1*04:05:01:02 | DRB4*01:03:0<br>1:01 | DRB4*01:03:0<br>1:01 |
| <b>JG149</b> | DQB1*02:01:0<br>1    | DQB1*03:01:0<br>1:01 | DRB1*03:01:01:01 | DRB1*04:01:01:01 | DRB3*01:01:0<br>2:01 | DRB4*01:03:0<br>1:10 |
| <b>JG159</b> | DQB1*03:01:0<br>1:01 | DQB1*02:02:0<br>1:01 | DRB1*04:01:01:03 | DRB1*07:01:01:04 | DRB4*01:03:0<br>1:10 | DRB4*01:01:0<br>1:01 |
| <b>JG262</b> | DQB1*03:02:0<br>1:02 | DQB1*02:01:0<br>1    | DRB1*04:04:01    | DRB1*03:01:01:01 | DRB4*01:03:0<br>1:10 | DRB3*01:01:0<br>2:01 |
| <b>JG272</b> | DQB1*06:02:0<br>1:01 | DQB1*03:01:0<br>1:03 | DRB1*15:03:01:02 | DRB1*13:03:01    | DRB5*01:01:0<br>1:01 | DRB3*01:01:0<br>2:03 |

**Supplementary Table 4. Antibodies used in flow cytometry experiments.**

| <b>Marker</b>                       | <b>Clone</b> | <b>Fluorescence</b>  | <b>Company</b> | <b>Dilution</b> |
|-------------------------------------|--------------|----------------------|----------------|-----------------|
| <b>CD3</b>                          | SK7          | APC-H7               | BD Biosciences | 1:200           |
| <b>CD4</b>                          | RPA-T4       | FITC                 | BD Biosciences | 1:200           |
|                                     |              | Pacific Blue         | BioLegend      | 1:200           |
| <b>CD8</b>                          | RPA-T8       | Alexa Fluor 700      | BD Biosciences | 1:200           |
| <b>CD69</b>                         | FN50         | PerCP-Cy5.5          | BD Biosciences | 1:200           |
| <b>GPR56</b>                        | CG4          | PE                   | BioLegend      | 1:200           |
| <b>TCR<math>\gamma\delta</math></b> | B1           | FITC                 | BD Biosciences | 1:200           |
| <b>Granzyme K</b>                   | G3H69        | Alexa Fluor 647      | BD Biosciences | 1:150           |
| <b>Granzyme B</b>                   | GB11         | PE                   | BD Biosciences | 1:200           |
|                                     |              | FITC                 |                | 1:200           |
| <b>CCR7</b>                         | 150503       | PE                   | BD Biosciences | 1:150           |
| <b>CD45RA</b>                       | HI100        | Brilliant Violet 421 | BioLegend      | 1:200           |
|                                     |              | FITC                 | BD Biosciences | 1:200           |
| <b>PD-1</b>                         | NAT105       | PerCP-Cy5.5          | BioLegend      | 1:200           |
| <b>TIM3</b>                         | F38-2E2      | APC                  | BioLegend      | 1:200           |
| <b>CD158b<br/>(KIR2DL2/L3)</b>      | DX27         | FITC                 | BioLegend      | 1:200           |
| <b>His-tag</b>                      | J095G46      | PE                   | BioLegend      | 1:100           |
| <b>HLA-A,B,C</b>                    | W6/32        | APC-Cy7              | BioLegend      | 1:200           |
| <b>Ki-67</b>                        | Ki-67        | Brilliant Violet 421 | BioLegend      | 1:100           |
| <b>IFN<math>\gamma</math></b>       | 4S.B3        | APC-Cy7              | BioLegend      | 1:200           |
|                                     | B27          | PE                   | BioLegend      | 1:200           |
|                                     | B27          | APC                  | BD Biosciences | 1:150           |
| <b>CD107a</b>                       | H4S3         | APC-Cy7              | BioLegend      | 1:200           |

**Supplementary Table 5. CITE-seq antibodies used in 10X single cell RNA sequencing.**

| <b>TotalSeqC-Barcode</b> | <b>Specificity</b> | <b>Clone</b> | <b>Reactivity</b> | <b>Barcode sequence</b> |
|--------------------------|--------------------|--------------|-------------------|-------------------------|
| 34                       | CD3                | UCHT1        | Human             | CTCATTGTAACCTCCT        |
| 45                       | CD4                | SK3          | Human             | GAGGTTAGTGATGGA         |
| 46                       | CD8                | SK1          | Human             | GCGCAACTTGATGAT         |
| 50                       | CD19               | HIB19        | Human             | CTGGGCAATTACTCG         |
| 63                       | CD45RA             | HI100        | Human             | TCAATCCTTCCGCTT         |
| 84                       | CD56               | QA17A16      | Human             | TTCGCCGCATTGAGT         |
| 85                       | CD25               | BC96         | Human             | TTTGTCTGTACGCC          |
| 87                       | CD45RO             | UCHL1        | Human             | CTCCGAATCATGTTG         |
| 88                       | PD-1               | EH12.2H7     | Human             | ACAGCGCCGTATTTA         |
| 89                       | TIGIT              | A15153G      | Human             | TTGCTTACCGCCAGA         |
| 139                      | TCRrd              | B1           | Human             | CTTCCGATTTCATTCA        |
| 140                      | CXCR3              | G025H7       | Human             | GCGATGGTAGATTAT         |
| 143                      | CCR6               | G034E3       | Human             | GATCCCTTTGTCACT         |
| 144                      | CXCR5              | J252D4       | Human             | AATTCAACCGTCGCC         |
| 146                      | CD69               | FN50         | Human             | GTCTCTTGGCTTAAA         |
| 147                      | CD62L              | DREG-56      | Human             | GTCCCTGCAACTTGA         |
| 148                      | CD197/CCR7         | G043H7       | Human             | AGTTCAGTCAACCGA         |
| 149                      | CD161              | HP-3G10      | Human             | GTACGCAGTCCTTCT         |
| 154                      | CD27               | O323         | Human             | GCACTCCTGCATGTA         |
| 159                      | HLA-DR             | L243         | Human             | AATAGCGAGCAAGTA         |
| 165                      | NKG2D              | 1D11         | Human             | CGTGTTTGTTCCTCA         |
| 168                      | CD57               | QA17A04      | Human             | AACTCCCTATGGAGG         |
| 179                      | CX3CR1             | K0124E1      | Human             | AGTATCGTCTCTGGG         |
| 224                      | TCRab              | IP26         | Human             | CGTAACGTAGAGCGA         |
| 246                      | CD122              | TU27         | Human             | TCATTTTCCTCCGATT        |
| 250                      | KLRG1              | 2F1/KLRG1    | Human/Mouse       | GTAGTAGGCTAGACC         |
| 386                      | CD28               | CD28.2       | Human             | TGAGAACGACCCTAA         |
| 389                      | CD38               | HIT2         | Human             | TGTACCCGCTTGTGA         |
| 390                      | IL-7Ra             | A019D5       | Human             | GTGTGTTGTCCTATG         |
| 592                      | CD158b/KIR2DL2/L3  | DX27         | Human             | GACCCGTAGTTTGAT         |
| 599                      | CD158e1/KIR3DL1    | DX9          | Human             | GGACGCTTTCCTTGA         |

**Supplementary Table 6. Gene list used to measure a score of synovial trafficking, cytotoxicity, proliferation or inflammation.**

| <b>RA trafficking</b> | <b>Cytotoxicity</b> | <b>Proliferation</b> | <b>Inflammation</b> |
|-----------------------|---------------------|----------------------|---------------------|
| <i>CXCR1</i>          | <i>GNLY</i>         | <i>HMGB2</i>         | <i>AGER</i>         |
| <i>CXCR2</i>          | <i>GZMA</i>         | <i>CDK1</i>          | <i>ALOX12</i>       |
| <i>CXCR3</i>          | <i>GZMB</i>         | <i>NUSAP1</i>        | <i>ALOX15</i>       |
| <i>CXCR4</i>          | <i>GZMH</i>         | <i>UBE2C</i>         | <i>ALOX5</i>        |
| <i>CXCR5</i>          | <i>GZMM</i>         | <i>BIRC5</i>         | <i>AREG</i>         |
| <i>CCR1</i>           | <i>GZMK</i>         | <i>TPX2</i>          | <i>ATF2</i>         |
| <i>CCR2</i>           | <i>NKG7</i>         | <i>TOP2A</i>         | <i>BCL2L1</i>       |
| <i>CCR3</i>           | <i>KLRB1</i>        | <i>NDC80</i>         | <i>BCL6</i>         |
| <i>CCR4</i>           | <i>KLRD1</i>        | <i>CKS2</i>          | <i>BIRC2</i>        |
| <i>CCR5</i>           | <i>KLRK1</i>        | <i>NUF2</i>          | <i>C1QA</i>         |
| <i>CCR6</i>           | <i>NCR1</i>         | <i>CKS1B</i>         | <i>C1QB</i>         |
| <i>CCR10</i>          | <i>SLAMF6</i>       | <i>MKI67</i>         | <i>C1R</i>          |
| <i>CX3CR1</i>         | <i>SLAMF7</i>       | <i>TMPO</i>          | <i>C1S</i>          |
| <i>CCL2</i>           | <i>TYROBP</i>       | <i>CENPF</i>         | <i>C2</i>           |
| <i>CCL3</i>           | <i>KIR3DL1</i>      | <i>TACC3</i>         | <i>C3</i>           |
| <i>CCL4</i>           | <i>KIR3DL2</i>      | <i>SMC4</i>          | <i>C3AR1</i>        |
| <i>CCL5</i>           |                     | <i>CCNB2</i>         | <i>C5</i>           |
| <i>CCL19</i>          |                     | <i>CKAP2L</i>        | <i>CCL17</i>        |
| <i>CCL20</i>          |                     | <i>CKAP2</i>         | <i>CCL19</i>        |
| <i>CXCL10</i>         |                     | <i>AURKB</i>         | <i>CCL2</i>         |
| <i>CXCL16</i>         |                     | <i>BUB1</i>          | <i>CCL20</i>        |
|                       |                     | <i>KIF11</i>         | <i>CCL22</i>        |
|                       |                     | <i>ANP32E</i>        | <i>CCL23</i>        |
|                       |                     | <i>TUBB4B</i>        | <i>CCL24</i>        |
|                       |                     | <i>GTSE1</i>         | <i>CCL3</i>         |
|                       |                     | <i>KIF20B</i>        | <i>CCL4</i>         |
|                       |                     | <i>HJURP</i>         | <i>CCL5</i>         |
|                       |                     | <i>CDCA3</i>         | <i>CCR1</i>         |
|                       |                     | <i>CDC20</i>         | <i>CCR2</i>         |
|                       |                     | <i>TTK</i>           | <i>CCR3</i>         |
|                       |                     | <i>CDC25C</i>        | <i>CCR4</i>         |
|                       |                     | <i>KIF2C</i>         | <i>CCR7</i>         |
|                       |                     | <i>RANGAP1</i>       | <i>CD4</i>          |

|  |  |               |                 |
|--|--|---------------|-----------------|
|  |  | <i>NCAPD2</i> | <i>CD40</i>     |
|  |  | <i>DLGAP5</i> | <i>CD40LG</i>   |
|  |  | <i>CDCA2</i>  | <i>CD55</i>     |
|  |  | <i>CDCA8</i>  | <i>CD86</i>     |
|  |  | <i>ECT2</i>   | <i>CDC42</i>    |
|  |  | <i>KIF23</i>  | <i>CEBPB</i>    |
|  |  | <i>HMMR</i>   | <i>CFB</i>      |
|  |  | <i>AURKA</i>  | <i>CFD</i>      |
|  |  | <i>PSRC1</i>  | <i>CFL1</i>     |
|  |  | <i>ANLN</i>   | <i>CREB1</i>    |
|  |  | <i>LBR</i>    | <i>CSF1</i>     |
|  |  | <i>CKAP5</i>  | <i>CSF2</i>     |
|  |  | <i>CENPE</i>  | <i>CXCL10</i>   |
|  |  | <i>CTCF</i>   | <i>CXCL3</i>    |
|  |  | <i>NEK2</i>   | <i>CXCL9</i>    |
|  |  | <i>G2E3</i>   | <i>CXCR1</i>    |
|  |  | <i>GAS2L3</i> | <i>CXCR2</i>    |
|  |  | <i>CBX5</i>   | <i>CXCR4</i>    |
|  |  | <i>CENPA</i>  | <i>CYSLTR1</i>  |
|  |  |               | <i>CYSLTR2</i>  |
|  |  |               | <i>DAXX</i>     |
|  |  |               | <i>DDIT3</i>    |
|  |  |               | <i>ELK1</i>     |
|  |  |               | <i>FASLG</i>    |
|  |  |               | <i>FLT1</i>     |
|  |  |               | <i>FOS</i>      |
|  |  |               | <i>FXRD2</i>    |
|  |  |               | <i>GNAQ</i>     |
|  |  |               | <i>GNAS</i>     |
|  |  |               | <i>GNB1</i>     |
|  |  |               | <i>GRB2</i>     |
|  |  |               | <i>HDAC4</i>    |
|  |  |               | <i>HIF1A</i>    |
|  |  |               | <i>HLA-DRA</i>  |
|  |  |               | <i>HLA-DRB1</i> |
|  |  |               | <i>HMGB1</i>    |
|  |  |               | <i>HMGB2</i>    |
|  |  |               | <i>HMGN1</i>    |
|  |  |               | <i>HRAS</i>     |

|  |  |  |                |
|--|--|--|----------------|
|  |  |  | <i>HSH2D</i>   |
|  |  |  | <i>HSPB1</i>   |
|  |  |  | <i>IFI44</i>   |
|  |  |  | <i>IFIT1</i>   |
|  |  |  | <i>IFIT2</i>   |
|  |  |  | <i>IFIT3</i>   |
|  |  |  | <i>IFNG</i>    |
|  |  |  | <i>IL10</i>    |
|  |  |  | <i>IL10RB</i>  |
|  |  |  | <i>IL12A</i>   |
|  |  |  | <i>IL13</i>    |
|  |  |  | <i>IL15</i>    |
|  |  |  | <i>IL17A</i>   |
|  |  |  | <i>IL18</i>    |
|  |  |  | <i>IL18RAP</i> |
|  |  |  | <i>IL1A</i>    |
|  |  |  | <i>IL1B</i>    |
|  |  |  | <i>IL1R1</i>   |
|  |  |  | <i>IL1RAP</i>  |
|  |  |  | <i>IL1RN</i>   |
|  |  |  | <i>IL2</i>     |
|  |  |  | <i>IL21</i>    |
|  |  |  | <i>IL22</i>    |
|  |  |  | <i>IL22RA2</i> |
|  |  |  | <i>IL23A</i>   |
|  |  |  | <i>IL23R</i>   |
|  |  |  | <i>IL3</i>     |
|  |  |  | <i>IL4</i>     |
|  |  |  | <i>IL5</i>     |
|  |  |  | <i>IL6</i>     |
|  |  |  | <i>IL6R</i>    |
|  |  |  | <i>IL7</i>     |
|  |  |  | <i>IRF1</i>    |
|  |  |  | <i>IRF3</i>    |
|  |  |  | <i>IRF5</i>    |
|  |  |  | <i>IRF7</i>    |
|  |  |  | <i>ITGB2</i>   |
|  |  |  | <i>JUN</i>     |
|  |  |  | <i>KEAP1</i>   |

|  |  |  |                 |
|--|--|--|-----------------|
|  |  |  | <i>LIMK1</i>    |
|  |  |  | <i>LTA</i>      |
|  |  |  | <i>LTB</i>      |
|  |  |  | <i>LTB4R</i>    |
|  |  |  | <i>LTB4R2</i>   |
|  |  |  | <i>LY96</i>     |
|  |  |  | <i>MAFF</i>     |
|  |  |  | <i>MAFG</i>     |
|  |  |  | <i>MAFK</i>     |
|  |  |  | <i>MAP2K1</i>   |
|  |  |  | <i>MAP2K4</i>   |
|  |  |  | <i>MAP2K6</i>   |
|  |  |  | <i>MAP3K1</i>   |
|  |  |  | <i>MAP3K5</i>   |
|  |  |  | <i>MAP3K7</i>   |
|  |  |  | <i>MAP3K9</i>   |
|  |  |  | <i>MAPK1</i>    |
|  |  |  | <i>MAPK14</i>   |
|  |  |  | <i>MAPK3</i>    |
|  |  |  | <i>MAPK8</i>    |
|  |  |  | <i>MAPKAPK2</i> |
|  |  |  | <i>MAPKAPK5</i> |
|  |  |  | <i>MASP2</i>    |
|  |  |  | <i>MAX</i>      |
|  |  |  | <i>MEF2A</i>    |
|  |  |  | <i>MEF2C</i>    |
|  |  |  | <i>MEF2D</i>    |
|  |  |  | <i>MKNK1</i>    |
|  |  |  | <i>MMP9</i>     |
|  |  |  | <i>MRC1</i>     |
|  |  |  | <i>MX1</i>      |
|  |  |  | <i>MX2</i>      |
|  |  |  | <i>MYC</i>      |
|  |  |  | <i>MYD88</i>    |
|  |  |  | <i>NFATC3</i>   |
|  |  |  | <i>NFE2L2</i>   |
|  |  |  | <i>NFKB1</i>    |
|  |  |  | <i>NLRP3</i>    |
|  |  |  | <i>NOD1</i>     |

|  |  |  |                 |
|--|--|--|-----------------|
|  |  |  | <i>NOD2</i>     |
|  |  |  | <i>NR3C1</i>    |
|  |  |  | <i>OAS2</i>     |
|  |  |  | <i>OASL</i>     |
|  |  |  | <i>PDGFA</i>    |
|  |  |  | <i>PLA2G4A</i>  |
|  |  |  | <i>PLCB1</i>    |
|  |  |  | <i>PPP1R12B</i> |
|  |  |  | <i>PRKCA</i>    |
|  |  |  | <i>PRKCB</i>    |
|  |  |  | <i>PTGDR2</i>   |
|  |  |  | <i>PTGER2</i>   |
|  |  |  | <i>PTGER4</i>   |
|  |  |  | <i>PTGIR</i>    |
|  |  |  | <i>PTGS1</i>    |
|  |  |  | <i>PTGS2</i>    |
|  |  |  | <i>PTK2</i>     |
|  |  |  | <i>RAC1</i>     |
|  |  |  | <i>RAF1</i>     |
|  |  |  | <i>RAPGEF2</i>  |
|  |  |  | <i>RELA</i>     |
|  |  |  | <i>RELB</i>     |
|  |  |  | <i>RHOA</i>     |
|  |  |  | <i>RIPK1</i>    |
|  |  |  | <i>RIPK2</i>    |
|  |  |  | <i>ROCK2</i>    |
|  |  |  | <i>RPS6KA5</i>  |
|  |  |  | <i>SHC1</i>     |
|  |  |  | <i>SMAD7</i>    |
|  |  |  | <i>STAT1</i>    |
|  |  |  | <i>STAT2</i>    |
|  |  |  | <i>STAT3</i>    |
|  |  |  | <i>TBXA2R</i>   |
|  |  |  | <i>TCF4</i>     |
|  |  |  | <i>TGFB1</i>    |
|  |  |  | <i>TGFB3</i>    |
|  |  |  | <i>TGFBR1</i>   |
|  |  |  | <i>TLR1</i>     |
|  |  |  | <i>TLR2</i>     |

|  |  |  |                |
|--|--|--|----------------|
|  |  |  | <i>TLR3</i>    |
|  |  |  | <i>TLR4</i>    |
|  |  |  | <i>TLR5</i>    |
|  |  |  | <i>TLR6</i>    |
|  |  |  | <i>TLR8</i>    |
|  |  |  | <i>TLR9</i>    |
|  |  |  | <i>TNF</i>     |
|  |  |  | <i>TNFAIP3</i> |
|  |  |  | <i>TNFSF14</i> |
|  |  |  | <i>TOLLIP</i>  |
|  |  |  | <i>TRADD</i>   |
|  |  |  | <i>TRAF2</i>   |
|  |  |  | <i>TREM2</i>   |
|  |  |  | <i>TSLP</i>    |
|  |  |  | <i>TYROBP</i>  |
